1 **Division of Labor between SOS and PafBC in mycobacterial DNA Repair and Mutagenesis**

2

3 Oyindamola O. Adefisayo<sup>1,2</sup> Pierre Dupuy<sup>2</sup>, James M. Bean<sup>2</sup>, Michael S. Glickman<sup>1,2, \*</sup>

4

5 1-Immunology and Microbial Pathogenesis Graduate Program, Weill-Cornell Graduate School

6 2-Immunology Program, Sloan Kettering Institute

7

8

9 \*

10 Correspondence to

11 Michael S. Glickman, MD

12 [glickmam@mskcc.org](mailto:glickmam@mskcc.org)

13 Immunology Program

14 Sloan Kettering Institute

15 1275 York Ave

16 New York, NY 10025

17 6468882368

18

19

20 **Abstract**

21

22 DNA repair systems allow microbes to survive in diverse environments that compromise  
23 chromosomal integrity. Pathogens such as *M. tuberculosis* must contend with the genotoxic host  
24 environment, which generates the mutations that underlie antibiotic resistance. Mycobacteria  
25 encode the widely distributed SOS pathway, governed by the LexA repressor, but also encode  
26 PafBC, a positive regulator of the transcriptional DNA damage response (DDR). Although the  
27 transcriptional outputs of these systems have been characterized, their full functional division of  
28 labor in survival and mutagenesis is unknown. Here we specifically ablate the PafBC or SOS  
29 pathways, alone and in combination, and test their relative contributions to repair. We find that  
30 SOS and PafBC have both distinct and overlapping roles that depend on the type of DNA damage.  
31 Most notably, we find that quinolone antibiotics and replication fork perturbation are inducers of  
32 the PafBC pathway, and that chromosomal mutagenesis is codependent on PafBC and SOS,  
33 through shared regulation of the DnaE2/ImuA/B mutasome. These studies define the complex  
34 transcriptional regulatory network of the DDR in mycobacteria and provide new insight into the  
35 regulatory mechanisms controlling the genesis of antibiotic resistance in *M. tuberculosis*.

36

37

38

## 39 Introduction

40

41 Cells are exposed to a variety of endogenous and exogenous factors that lead to DNA damage.  
42 DNA damage is particularly relevant to an intracellular pathogen such as *Mycobacterium*  
43 *tuberculosis* as its DNA is subject to assault from a variety of host defense mechanisms, many  
44 of which are genotoxic (1-5). There are multiple types of damage that occur on DNA, the most  
45 deleterious being double strand breaks. As DNA integrity is essential for cell survival, growth  
46 and replication, cells encode multiple genes necessary for DNA damage repair and response  
47 (6). The development of antibiotic resistance in *Mycobacterium tuberculosis* is solely the result  
48 of chromosomal mutations which arise during replication or because of DNA damage repair and  
49 response. A major regulator of the DNA damage response (DDR) in many bacteria is the  
50 inducible SOS pathway which is activated when the LexA repressor interacts with RecA  
51 nucleoprotein filaments on single strand DNA and undergoes autocatalytic cleavage (7-9).  
52 *Mycobacterium* also encodes a second DDR pathway, the PafBC pathway, which functions as a  
53 transcriptional activator with a currently unidentified activating signal (10). Although PafBC is  
54 encoded in an operon with the ubiquitin-like pup ligase PafA, PafB and PafC do not function in  
55 pup-proteasome system (11). Transcriptional analysis of both *M. smegmatis* and *M.*  
56 *tuberculosis* lacking the PafBC pathway ( $\Delta pafBC$ ) or *recA* ( $\Delta recA$ , as a surrogate for SOS  
57 inactivation) after DNA damage have defined the transcriptional regulon controlled by each  
58 pathway (10,12,13). These studies revealed that while there are some important overlaps in the  
59 genes regulated by these pathways, the PafBC pathway controls the larger transcriptional  
60 output post DNA damage (10,13). The PafBC proteins are not DNA damage inducible and  
61 therefore its mechanism of activation is unknown.

62 However, there are indications that despite having the smaller transcriptional regulon,  
63 the SOS pathway has an important functional role. For instance, the SOS pathway has been  
64 implicated in the survival of persistent cells (14) as well as in the induction of adaptive  
65 mutagenesis (15) in mycobacteria. The DnaE2 polymerase, which is required for mutagenesis  
66 in *M. tuberculosis* and *M. smegmatis*, is reported to be under SOS control (15). However, prior  
67 literature has used inactivation of RecA as a surrogate for SOS inactivation, due to the essential  
68 role of RecA as the LexA coprotease. Although RecA null cells are clearly SOS null, RecA has  
69 pleiotropic roles in DSB repair, replication fork restart, and other functions (8,16), raising the  
70 possibility that RecA inactivation may have broader effects than simply SOS inactivation (17-  
71 19). Our knowledge of the functional overlap between the SOS and PafBC pathways in the  
72 mycobacterial DDR is therefore very limited.

73           This work aims to elucidate how SOS and PafBC functionally contribute to the DNA  
74 damage response after distinct types of DNA damage by specifically ablating SOS and PafBC,  
75 alone or in combination, in comparison to loss of RecA. To specifically ablate SOS and avoid  
76 confounding functions of RecA, we engineered LexA-S167A, which prevents LexA autocatalytic  
77 cleavage. Characterization of these bacterial mutants revealed that, although PafBC does  
78 control a larger gene set, the two systems are both required for repair, with SOS playing a  
79 dominant role after UV damage and PafBC more important for survival after gyrase inhibition.  
80 Studies with specific DNA damaging agents further confirmed that gyrase inhibition and  
81 replication fork perturbation specifically activate the PafBC pathway. Finally, we show that,  
82 although DnaE2, the primary mutagenic polymerase of mycobacteria, is under SOS control after  
83 UV damage, it is coregulated by SOS and PafBC after gyrase inhibition. Further the ImuA/B  
84 cassette, also required for mutagenesis, is under dual control and, accordingly, mutagenesis is  
85 coregulated by both pathways.  
86  
87

88

## 89 **Results**

90

### 91 **Genetic ablation of the DNA damage response in *M. smegmatis***

92

93 To investigate the division of labor between the PafBC and SOS DDR pathways, we constructed  
94 mutants of each pathway, alone and in combination, in *M. smegmatis*. The PafBC pathway was  
95 ablated by deletion of the coding sequences of both proteins ( $\Delta pafBC$ ) using a previously  
96 validated homologous recombination based knockout strategy (20). LexA is a repressor that is  
97 inactivated by RecA stimulated autocatalytic proteolysis (21). As such, deletion of *lexA* results in  
98 derepression of SOS, whereas deletion of *recA* may be a poor surrogate for SOS ablation due to  
99 its pleiotropic roles in DNA repair. To circumvent this problem, we introduced a point mutation into  
100 the *lexA* chromosomal locus to direct synthesis of LexA-S167A, which renders LexA uncleavable  
101 (22), in both the wild type (*mc*<sup>2</sup>155) and  $\Delta pafBC$  strains. These strains (WT,  $\Delta pafBC$ , *lexAS167A*,  
102  $\Delta pafBC/lexAS167A$ ,  $\Delta recA$ ), were analyzed by PCR to confirm their genotypes (Fig 1A).

103 To confirm that the LexAS167A mutation impairs LexA cleavage in vivo, as it did in vitro  
104 (data not shown), we analyzed LexA levels by immunoblotting, with or without 20mJ/cm<sup>2</sup> UV light  
105 (Fig 1B). In wild type *M. smegmatis*, LexA protein was detectable at its predicted MW of 28kDa in  
106 basal conditions (Fig 1B). With UV treatment, full length LexA became nearly undetectable,  
107 although we were unable to detect LexA proteolytic fragments (Fig 1B). In the predicted SOS  
108 deficient strains ( $\Delta recA$ , *lexAS167A* and *pafBC/lexAS167A*), there was no discernible loss of LexA  
109 protein with DNA damage (Fig 1B), consistent with impaired LexA cleavage. Ablation of *pafBC*  
110 had no effect on LexA cleavage with damage.

111 To confirm that both pathways, PafBC and SOS, are functionally impaired by these  
112 mutations, we took advantage of the dual regulation of *recA* transcription by both pathways. The  
113 *recA* promoter contains binding sites for both LexA and PafBC (10,17) and is therefore subject to  
114 dual regulation (Fig 1C). We introduced mutations into the SOS box (P2) or the PafBC binding  
115 sites (P1) and used these mutated promoters to drive RecA-STII expression in WT *M. smegmatis*  
116 or in strains lacking PafBC, SOS, or both (Fig 1D & E). When RecA is controlled only by SOS (P1  
117 mutated, Fig 1D) RecA protein is induced with DNA damage (either UV or quinolone treatment)  
118 in WT cells. In cells lacking *pafBC*, RecA protein is induced by UV but not by quinolone treatment  
119 (a phenotype which will be discussed later) but RecA expression by both UV and quinolone  
120 treatment is impaired in cells lacking SOS or both pathways, indicating that the LexA-S167A  
121 strongly impairs SOS activation in vivo (Figure 1D). In contrast, when RecA is controlled only by

122 PafBC (P2 mutated, Figure 1E), RecA protein is not induced with DNA damage in cells lacking  
123 PafBC but is inducible in WT cells as well as cells lacking SOS (Figure 1E). These experiments  
124 confirm the functional inactivation of the PafBC and SOS pathways and provide a genetic model  
125 system to dissect the relative roles of these two pathways in DNA repair and mutagenesis.

126

### 127 **Roles of SOS and PafBC in the transcriptional DDR across DNA damaging agents**

128

129 The transcriptomic profiles of both the  $\Delta pafBC$  and  $\Delta recA$  strains have been assessed primarily  
130 in response to mitomycin C (MMC) in *M. smegmatis* and *M. tuberculosis* (10,12,13). However,  
131 different types of DNA damaging agents produce fundamentally different types of DNA lesions  
132 that may require unique systems for correction, the expression of which may in turn be governed  
133 by SOS or PafBC. To investigate the possibility of DNA damage specific responses for these  
134 pathways, we measured the transcriptional responses of the WT,  $\Delta recA$ ,  $\Delta pafBC$ , *lexAS167A* and  
135  $\Delta pafBC/lexAS167A$  strains after exposure to UV or ciprofloxacin. In WT cells, UV and  
136 ciprofloxacin induced a common set of 185 genes ( $\log_2$  fold change of  $\geq 1.5$ , Supplementary Fig  
137 1A). There were an additional 24 genes exclusively induced by cipro which were composed of  
138 genes predicted to be involved in replication, recombination, and repair. In contrast, UV induced  
139 an additional 174 genes, most of which were genes with unknown function. To deduce whether  
140 PafBC or LexA control different gene sets in response to different types of DNA damage, we  
141 focused on the subset of genes that were commonly induced by UV and ciprofloxacin (from our  
142 studies) as well as MMC from the literature in wild type cells (10).

143 Transcriptomic profiling of the DDR pathway mutants revealed three major DNA damage  
144 response profiles. Profile 1 consists of genes whose expression levels with DNA damage are  
145 completely dependent on the PafBC pathway, and independent of RecA, and this gene set is the  
146 largest regulon transcriptionally induced after DNA damage (Fig 2A and Table S1), consistent  
147 with prior studies (10). 35% of these genes are predicted to encode proteins involved in  
148 replication, recombination, and repair, which has been previously noted as being overrepresented  
149 in the PafBC regulon after MMC induced damage (10). Profile 2 consists of genes that have  
150 varying degrees of dependence on PafBC, SOS, or RecA (Fig 2B and Table S2). Of particular  
151 interest are the genes that are codependent on PafBC and SOS after ciprofloxacin damage, but  
152 are PafBC independent after UV (Fig 2B, red and blue boxes). This subset is of interest because  
153 they indicate DDR pathway clastogen specific responses and consist of genes with important  
154 roles in DNA damage repair and response. Although UV induces a larger number of genes  
155 compared to ciprofloxacin (Fig S1A), this pathway specific pattern is unique to ciprofloxacin. 27%

156 of the DDR pathway ciprofloxacin specific subset have a partial or complete loss of induction in  
157 the  $\Delta pafBC$  or  $lexAS167A$  strains. Of the genes with ciprofloxacin specific induction in the  
158  $lexAS167A$  strain, 82% are also either fully or partially dependent on the PafBC pathway. Profile  
159 3 consists of genes that are DNA damage inducible but have no discernible loss of expression in  
160 any of the DDR pathway mutants (Fig 2C & Table S3). A majority of these are genes with unknown  
161 functions. These results confirm prior results that PafBC controls a numerically larger number of  
162 DNA damage inducible genes irrespective of the type of DNA damage (Figures 2D & E), but also  
163 indicate that there are clastogen and pathway specific overlapping gene sets within the DNA  
164 damage response.

165  
166 We extended these findings to *M. tuberculosis* by comparing the transcriptional response of a  
167 strain of *M. tuberculosis* H37Rv with a transposon insertion in *pafC* to both WT (H37Rv) and a  
168 *pafC::tn* complemented strain after exposure to both UV and ciprofloxacin. Like *M. smegmatis*,  
169 UV induced a larger number of genes in WT compared to ciprofloxacin (Fig S1B). Although the  
170 number of genes uniquely induced by ciprofloxacin alone in both *M. smegmatis* and *M.*  
171 *tuberculosis* WT cells being similar (Fig S1B), the only ciprofloxacin-unique gene that was induced  
172 in both mycobacterial species was *dnaQ* (Rv3711c/MSMEG\_6275). Mycobacterial DnaQ is a  
173 homologue of the *E.coli* 3'-5' exonuclease epsilon. To confirm the PafBC and ciprofloxacin  
174 phenotypes observed in *M. smegmatis*, we focused on the subset of genes that were induced by  
175 both UV and ciprofloxacin (Fig S1B). Although an *M. tuberculosis* LexA uncleavable strain was  
176 not available for comparison, we observed that 57% of the genes are no longer induced by either  
177 clastogen in the absence of PafBC (Table S4). We also observed a similar subset of genes that  
178 have a PafBC ciprofloxacin dependent phenotype and include *recA* (Table S4 and Fig S1C). This  
179 data confirms our observation of clastogen specific gene sets within the DNA damage response.

180  
181 To confirm our RNAseq results and gain a clearer temporal picture of the roles of the SOS and  
182 PafBC pathways in the temporal transcriptional response to different DNA damaging agents, we  
183 analyzed the mRNA encoding AdnA (a PafBC dependent gene in our RNAseq dataset and in  
184 the literature (10,12)) and DnaE2 (an SOS dependent gene as defined in our RNAseq dataset  
185 and in the literature (12)) by RT-qPCR. Analyzing the expression of *adnA* after treatment with  
186 UV, ciprofloxacin or MMC confirmed the results from the transcriptomic profiling that both basal  
187 and induced *adnA* expression are dependent on the PafBC pathway, regardless of the DNA  
188 damaging agent tested, as reflected in the significantly reduced expression of *adnA* with or  
189 without DNA damage in the  $\Delta pafBC$  and  $\Delta pafBC/lexA-S167A$  strains (Fig 3A-C). Impairment of



190 the SOS pathway in both the  $\Delta recA$  and  $lexAS167A$  strains led to a significant increase in *adnA*  
191 expression in basal conditions (Fig 3A-C). However, induction of *adnA* in the SOS deficient  
192 strains after DNA damage was not impaired compared to wild type cells, further confirming that  
193 *adnA* is exclusively controlled by the PafBC, RecA independent pathway. The expression  
194 of *adnA* in the  $\Delta pafBC$  strain was rescued by expressing either *M. smegmatis* or *M. tuberculosis*  
195 PafBC (Fig 3D), confirming that these phenotypes are due to loss of PafBC function.

196  
197 *dnaE2* is reported to be SOS dependent, a conclusion that is derived from its impaired expression  
198 in mycobacteria lacking *recA* (12). Our experiments confirm this impaired expression of *dnaE2*  
199 with DNA damage in  $\Delta recA$  (Fig 3E-G). However, although loss of SOS in the  $lexAS167A$  strain  
200 impairs *dnaE2* induction to a greater degree than loss of *pafBC*, there is a significant impairment  
201 of *dnaE2* expression in  $\Delta pafBC$ , especially with ciprofloxacin and MMC. Only in the  
202  $\Delta pafBC/lexAS167A$  strain does *dnaE2* expression phenocopy that observed in  $\Delta recA$  (Fig 3E-G).  
203 The impaired expression of *dnaE2* in the  $\Delta pafBC$  was rescued by complementation with either *M.*  
204 *smegmatis* or *M. tuberculosis pafBC* (Fig 3H).

205 We extended these findings to *M. tuberculosis* using the strain of *M. tuberculosis* H37Rv  
206 with a transposon insertion in *pafC*. We confirmed that *adnA* expression is reduced in basal  
207 conditions in cells lacking *pafC*, a phenotype that is complemented by the wild type gene (Fig 3I).  
208 UV or ciprofloxacin induction of *adnA* was completely abrogated in *pafC::tn* (Fig 3I). In contrast,  
209 although UV induced *dnaE2* expression was independent of *pafC* (Fig 3J), *dnaE2* induction with  
210 ciprofloxacin was substantially dependent on *pafC* (Fig 3J), again complemented by wild type  
211 *pafC* (Fig 3J) as is seen in *M. smegmatis*. These results mirrored the transcriptional induction of  
212 both *adnA* and *dnaE2* observed in *M. tuberculosis* by RNA sequencing (Table S4). Taken  
213 together, these data confirm the PafBC dependence of *adnA* expression, but also implicate PafBC  
214 in *dnaE2* expression under specific conditions. These data suggest that these two systems may  
215 mediate the response to different types of DNA damage and indicate that loss of *recA* has more  
216 severe effects on the DDR than specific ablation of the SOS pathway that more closely resembles  
217 loss of both SOS and PafBC. These data suggest a role for RecA in inducing the PafBC regulon  
218 under certain types of DNA damage.

219

220 **Roles of SOS and PafBC in DNA damage survival across DNA damaging agents**

221



222 Although the transcriptional output controlled by PafBC or LexA is useful to understand the  
223 relative roles of these two transcription factors, the ultimate functional outcomes of the DDR may  
224 be governed by a small number of gene products or non-transcriptional mechanisms (8). To  
225 functionally characterize the relative contributions of LexA and PafBC, we measured the survival  
226 of the mutants after treatment with the same clastogens used for transcriptional profiling. As  
227 previously described (8), loss of *recA* severely sensitizes *M. smegmatis* to all forms of DNA  
228 damage, a phenotype that could partially reflect its role in SOS induction, but also other repair  
229 roles such as DSB repair and restart of stalled replication forks (18,19). Loss of LexA cleavage  
230 severely sensitized cells to UV killing, almost to the same degree as loss of *recA*, with PafBC  
231 playing a more minor role, especially at low doses (Fig 4A). Only the  $\Delta pafBC/lexA-S167A$  strain  
232 fully phenocopied loss of *recA*. With gyrase inhibition (ciprofloxacin), the PafBC and SOS  
233 pathways contributed nearly equally, but only loss of both pathways phenocopied loss of *recA*  
234 (Fig 4B). For mitomycin, loss of LexA cleavage sensitized cells to killing more than loss of PafBC  
235 (Fig 4C). The sensitivity of the  $\Delta pafBC$  strain was rescued by expressing *M. smegmatis* or *M.*  
236 *tuberculosis pafBC* (Fig 4D). These results indicate that, despite controlling a smaller number of  
237 genes, the SOS pathway plays an important role in survival after damage. In addition, the data  
238 confirms the finding from transcriptional profiling that these two pathways respond to different  
239 types of damage, with SOS having a dominant role for UV and crosslinking and PafBC playing a  
240 more important role in the response to gyrase inhibition.

241

## 242 **Roles of SOS and PafBC in adaptive mutagenesis**

243

244 DnaE2 has previously been shown to play a major role in adaptive mutagenesis after UV induced  
245 DNA damage (15). As we observed that *dnaE2* expression is controlled by both SOS and PafBC  
246 when DNA damage was induced by MMC and ciprofloxacin, but not by UV, we quantitated the  
247 functional output of adaptive mutagenesis by measuring the appearance of Rifampin resistance  
248 ( $Rif^R$ ) after UV light exposure. As expected, UV strongly induces the frequency of  $Rif^R$  in WT  
249 cells and loss of *recA* abolishes that induction (Fig 5A) (8). Surprisingly, we found loss of either  
250 DDR pathway ( $\Delta pafBC$  and *lexAS167A* strains) impaired mutagenesis (Fig 5A), whereas loss of  
251 both pathways eliminated mutagenesis (Fig 5A). The loss of mutagenesis in the  $\Delta pafBC$  mutant  
252 could be rescued by complementation using *M. smegmatis pafBC* (Fig 5B). Extending these  
253 findings to *M. tuberculosis* revealed a reduction in adaptive mutagenesis in the absence of *pafC*,  
254 a phenotype that was complemented by the wild type *pafC* gene (Fig 5C). The decrement of UV-

255 induced mutagenesis in the absence of the PafBC pathway was surprising because *dnaE2*  
256 expression was not significantly reduced after UV exposure in either *M. smegmatis* or *M.*  
257 *tuberculosis pafBC* single mutants (Fig 3E & 3J). Although DnaE2 activity is required for its  
258 mutagenic role in vivo (15), the mutasome also consists of the ImuA/B cassette, which are also  
259 required for mutagenesis in vivo (23). These genes are reported to be SOS regulated (12), but  
260 recent data also indicates that there is a PafBC binding site in the *imuA'* (MSMEG\_1620) promoter  
261 and DNA damage induced expression of *imuA/B* was impaired in *M. smegmatis* lacking *pafBC*  
262 (10). Consistent with this prior data, our transcriptomic profiling revealed that *imuA/B* are strongly  
263 induced by both UV and quinolone damage and this induction is abolished in cells lacking *recA*,  
264 a finding previously interpreted to indicate SOS dependence. To clarify the regulation of *imuA/B*,  
265 we measured the expression of *imuB*, which is an operon with *imuA* (23), by RT-qPCR and found  
266 that *imuB* expression was significantly impaired by the loss of either the SOS and PafBC pathways  
267 (Figure 5D and 5E). We observed a partial impairment of *imuB* in both the *lexAS167A* and  $\Delta$ *pafBC*  
268 knockout strains, with a stronger impairment conferred after ciprofloxacin induced DNA damage  
269 and only in the *pafBC/lexAS167A* strain did we observe complete loss of *imuB* expression that  
270 phenocopied loss of *recA* (Fig 5D). In *M. tuberculosis*, *imuB* expression was induced with UV  
271 exposure, and was mildly impaired in cells lacking *pafC* (Figure 5E). However, *imuB* induction  
272 after ciprofloxacin was abolished in *pafC::tn* cells, a phenotype that was complemented by wild  
273 type *pafC* (Fig 5E). These data indicate that both the PafBC and SOS pathways contribute to  
274 adaptative mutagenesis in mycobacteria, in part through shared regulation of the *dnaE2* cofactors  
275 *imuA/B*.

276

### 277 **Dual regulation of the RecA promoter is clastogen specific**

278

279 The data presented above indicates that PafBC and SOS have both shared and independent  
280 roles in the DDR, which may reflect overlapping functionality of their regulons or dual regulation  
281 of specific gene products, as is the case for *imuA/B*. *recA* is one example of a gene directly  
282 regulated by both PafBC and SOS as it contains binding sites for LexA and PafBC in its promoter  
283 ((17) and Fig 1C). To further examine whether SOS and PafBC respond to distinct signals, we  
284 used RecA expression to measure the temporal output of both pathways. RecA protein  
285 expression after UV treatment was strongly induced by one hour, and although the  $\Delta$ *pafBC* strain  
286 has lower baseline RecA expression without DNA damage, RecA levels reach the same level by  
287 three hours (Fig 6A). A similar pattern was observed in SOS deficient cells, indicating that both  
288 pathways control UV induced RecA expression. In contrast, ciprofloxacin treatment strongly

289 induced RecA in wild type cells, but this induction was abolished in cells lacking PafBC, and  
290 preserved in cells lacking SOS (Fig 6B). In the case of mitomycin C, all three tested strains had  
291 similar expression levels of RecA both with and without DNA damage (Fig 6C). This ciprofloxacin  
292 specific loss of RecA induction is rescued by complementing  $\Delta pafBC$  with either *M.smegmatis* or  
293 *M.tuberculosis pafBC* (Fig 6D). These findings indicate that the overlapping functions of these  
294 pathway are in part governed by the type of DNA damage. Most remarkable is the finding that  
295 quinolones appear to be specific inducers of the PafBC arm of the DDR. To confirm this finding  
296 in *M. tuberculosis*, we treated the H37Rv *pafC* transposon mutant with cipro and UV and  
297 measured RecA protein. Although UV induced RecA expression was unaffected by loss of *pafC*,  
298 quinolone induced RecA expression was completely dependent on *pafC*, consistent with the  
299 results in *M. smegmatis* (Fig 6E). These results indicate that ciprofloxacin is a specific inducer of  
300 the PafBC pathway.

301  
302 **Damage survival and mutagenesis of SOS and PafBC are not due to impaired RecA**  
303 **expression**

304  
305 Although the data above clearly delineates overlapping and clastogen specific roles for SOS and  
306 PafBC in RecA expression, and RecA has multiple roles in DNA repair and mutagenesis, the  
307 contribution of impaired RecA expression to the functional defects observed in cells lacking SOS,  
308 *pafBC*, or both, is unknown. To examine this question, we placed RecA expression under the  
309 control of an anhydrotetracycline (ATc) inducible promoter (*irecA*) and complemented the WT,  
310  $\Delta recA$ ,  $\Delta pafBC$ , *lexAS167A* and,  $\Delta pafBC/lexAS167A$  strains. Addition of ATc induced RecA  
311 protein accumulation at a higher level than wild type cells in the absence of DNA damage and  
312 enhanced UV induced RecA accumulation (Fig. S2A). UV treatment of the  $\Delta recA$  strain  
313 complemented with *irecA* revealed no inducibility of RecA, but constant RecA levels with ATc (Fig  
314 S2A). *irecA* restored RecA expression in the SOS and PafBC deficient strains (Figure S2B)  
315 including the doubly deficient strain, which has nearly undetectable RecA levels.

316 To test whether enforced RecA expression could reverse the DNA damage sensitivity  
317 phenotypes observed with SOS and PafBC deficient cells, we measured killing with UV with and  
318 without RecA expression. Although *irecA* expression did not change the survival profile of the WT  
319 cells, it did fully rescue the severe survival defect of the  $\Delta recA$  strain treated with UV, indicating  
320 that *irecA* encodes a functional RecA protein that is expressed at levels that can rescue complete  
321 RecA deficiency (Fig S2C). However, restoration of RecA expression had no effect on the survival  
322 of SOS, PafBC, or doubly deficient cells (Fig S2C). Similarly, *irecA* did not change the DNA

323 damage induced transcription of *adnA* in WT cells and was unable to rescue the loss of *adnA*  
324 transcription in either the  $\Delta pafBC$  or  $\Delta pafBC/lexA$  S167A strains (Fig S2D). However, *irecA* fully  
325 rescued *dnaE2* expression in  $\Delta recA$ , and partially rescued the transcription of *dnaE2* in the  
326 *lexAS167A* and  $\Delta pafBC/lexAS167A$  strains (Fig S2E). These results indicate that, despite the  
327 prominent coregulation of RecA expression by PafBC and SOS, the defective RecA expression  
328 conferred by loss of these pathways does not explain their damage sensitivity.

329

### 330 **Replisome perturbation induces the PafBC pathway**

331

332 An essential question about the PafBC pathway is its mechanism of activation. The PafBC  
333 proteins are not themselves damage inducible (10), suggesting that a signal generated by DNA  
334 damage results in PafBC activation. Whether this occurs at the level of induced DNA binding,  
335 dimerization, or some other mechanism, is unknown (24). The data above indicates that  
336 quinolones may be a specific activating signal for the PafBC pathway (Fig 6). Quinolones act by  
337 inhibiting DNA gyrase and thereby affect DNA replication and transcription, in addition to inducing  
338 protein linked double strand DNA breaks. To understand the induction of the PafBC pathway by  
339 quinolones, we tested other stresses that may impact DNA replication or transcription. Although  
340 oxidative stress induction by cumene hydroperoxide (CHP) (Fig 7A) or inhibiting DNA replication  
341 using the antimicrobial SKI-356313 (25) (Fig 7B) both induced RecA expression in WT cells, this  
342 induction was not dependent on *pafBC*. In contrast, the topoisomerase inhibitor etoposide (26)  
343 induced RecA in WT cells, and this induction was substantially dependent on PafBC, but not SOS  
344 (Fig 7C). To more precisely perturb DNA replication, we expressed the alternative lesion bypass  
345 polymerase DinB1 from an ATc inducible promoter. Mycobacterial DinB1 interacts with the DNA  
346 replication machinery beta clamp (27) and therefore may stall the replication fork when  
347 overexpressed. Consistent with this prediction, DinB1 expression strongly induced RecA (Fig 7D),  
348 but this induction was abolished when DinB1 $\Delta$ 356-360 was expressed, which carries a mutation  
349 in the beta-clamp interacting motif (Fig 7E). RecA induction by DinB1 overexpression was lost in  
350  $\Delta pafBC$  but preserved in the SOS deficient strain (Fig 7D), consistent with the hypothesis that  
351 perturbation of the replication fork is an inducer of the DDR pathway. Polymerase inactive DinB1  
352 (*dinB1* D113A) strongly induced RecA, but this induction was no longer *pafBC* dependent (Fig  
353 7F), suggesting that this inactive polymerase activated an alternative form of DNA damage,  
354 possibly by inhibiting access of repair factors to the fork.

355

356

357 **Discussion**

358

359 In this study, we have taken a comprehensive approach to examine the transcriptional and  
360 functional contributions of both the PafBC and SOS pathways in the mycobacterial DNA damage  
361 response program. Our findings reveal the requirement for both pathways to mount a full and  
362 effective response to DNA damage inflicted by various DNA damaging conditions. Our analysis  
363 of the transcriptional response of mycobacteria to distinct types of DNA damage reveal that,  
364 although the PafBC pathway controls the larger transcriptional response irrespective of the type  
365 of DNA damage, both arms of the DDR are required for survival after damage and for  
366 mutagenesis. In addition, we reveal important differences between the pathways that in part  
367 depend on the type of DNA damaging agent. Most prominently, our data indicates that quinolone  
368 antibiotics, which inhibit DNA gyrase, or replication fork perturbation, specifically induce the  
369 PafBC arm of the DDR.

370

371

372 Despite encoding a larger transcriptional regulon, our findings reveal that both the SOS and  
373 PafBC pathways play major roles in surviving the effects of DNA damage and in mutagenesis  
374 that results from the repair of this damage. In mycobacteria, the mutasome consists of a complex  
375 of the DnaE2 polymerase (15), along with ImuB-ImuA (23), all of which are required for the  
376 generation of rifampin resistance mutations. ImuB interacts directly with the beta-clamp of the  
377 replication apparatus and DnaE2 (23). Our results indicate that a partial loss of *imuA/B* expression  
378 in the absence of the PafBC pathway is accompanied by impaired mutagenesis in cells lacking  
379 *pafBC*. Although *imuA/B* expression is partially SOS dependent, *M. smegmatis* or *M. tuberculosis*  
380 lacking *pafBC* or *pafC* respectively display impaired *dnaE2* or *imuB* expression after DNA  
381 damage. This *pafC* dependence is particularly dramatic after gyrase inhibition, during which  
382 *dnaE2* or *imuB* expression is completely *pafBC* dependent.

383

384 This quinolone specific, *pafBC* dependent response to DNA damage has potential clinical  
385 relevance. Although the in vitro activity of quinolones against *M. tuberculosis* has long been  
386 recognized, and they have been part of second line therapy for MDR TB, recent clinical data  
387 indicates a role for the quinolone Moxifloxacin in 4-month Rifapentine regimens to treat drug  
388 sensitive TB (28). Coupled with our finding that there is a role for PafBC in supporting  
389 mutagenesis, our findings provide a molecular basis for the possibility that widespread use of

390 quinolones for TB treatment may promote mutations that could enhance resistance to other  
391 antibiotics. In *E.coli*, studies have shown a requirement for the SOS pathway in inducing  
392 mutagenesis after quinolone treatment (29).

393

394 Our data provide perspective on prior efforts to understand the division of labor between the  
395 classical SOS pathway and the PafBC pathway. Based on the validated role for RecA as the LexA  
396 coprotease, and before the identification of PafBC, groundbreaking work demonstrated that the  
397 mycobacterial DDR had “RecA dependent” and “RecA independent” arms (12,30,31). The RecA  
398 dependent arm was thought to represent the SOS arm of the pathway. However, the data  
399 presented here reveals a more complex relationship between RecA and SOS. Although RecA  
400 null cells are clearly SOS null, they also are clearly more severely deficient for DNA repair and  
401 mutagenesis than cells specifically ablated for SOS. Only when SOS and PafBC are both ablated  
402 do the DNA damage phenotypes resemble loss of RecA. The activation signal for the PafBC  
403 pathway is unknown. The PafBC heterodimer is constitutively expressed and therefore one model  
404 of its activation, in part based on structural studies (24), is that a ligand generated during DNA  
405 damage binds directly to PafBC and induces a conformational change that results in DNA binding.  
406 Alternative models are possible, including sequestration of the heterodimer in basal conditions  
407 and/or induced heterodimerization. Our study does not identify the specific inducing signal for the  
408 PafBC pathway, but our data does support a model in which this signal is generated by replication  
409 fork perturbation or arrest. Given the role of RecA in replication fork restart (19), our data may  
410 suggest that in certain circumstances the activating signal for PafBC requires RecA and  
411 replication fork perturbation, a hypothesis that can be pursued by future studies.

412

413

414

416 **Acknowledgements**

417

418 The authors thank Heran Darwin for providing the H37Rv *paFC* Tn and complemented strains.

419 This work was supported by NIH grants AI 064693, P30 CA008748.

420

421 **Conflicts of interest**

422 MG serves as an SAB member and holds equity in Vedanta Biosciences, is on the SAB of PRL-

423 NYC, and is a consultant for Fimbrion therapeutics.

424



425

## 426 **Methods**

427

### 428 **Bacterial strains/plasmid Constructions and Growth Conditions**

429 *Mycobacterium smegmatis* strains are derivatives of mc<sup>2</sup>155 and were grown and maintained in  
430 Difco Middlebrook 7H9 media (broth) supplemented with 10% ADS (0.5% albumin, 0.085% NaCl,  
431 0.2% dextrose) and 0.05% Tween 80 or on Difco Middlebrook 7H10 (agar) supplemented with  
432 0.5% glycerol and 0.5% dextrose at 37°C. Gene deletions were made by homologous  
433 recombination and double negative selection (20). The point mutant of LexA was generated using  
434 the previously described oligo recombineering procedure (32). Mutant strains were confirmed by  
435 PCR using primers outside the cloned region, followed by sequencing of the amplified PCR  
436 product to confirm the strains. *Mycobacterium tuberculosis* strains are on the H37Rv background  
437 and were grown and maintained in 7H9 media (broth) or on 7H10 (agar) supplemented with 10%  
438 Oleic Acid-Albumin-Dextrose-Catalase supplement (OADC), 0.5% glycerol, and 0.01% Tyloxapol  
439 (broth only) at 37°C. For a complete strain list with relevant features, see Supplementary table  
440 4. Plasmids utilized in this study were generated using standard molecular techniques and along  
441 with relevant oligos are listed with their features in Supplementary table 4.

442

### 443 **RT-qPCR**

444 *M. smegmatis* cultures were grown to OD600 ~ 0.5 - 0.6, collected by centrifugation at 3200G  
445 and re-suspended to OD600 = 0.6. For each treatment (0.5µg/ml Ciprofloxacin, 80ng/ml  
446 Mitomycin C or 10ml culture exposed to 20mJ/cm<sup>2</sup> UV), 10ml cultures were shaken at 37 °C  
447 /150RPM at a final OD600 = 0.3 (For UV, 5ml treated culture in 5ml of fresh media) for the  
448 indicated time hours and collected for RNA preparation, lysed by bead beating 3x for 30 seconds  
449 and after a 24-hour incubation in 500ul RNAlater buffer RNA was isolated using the GeneJet RNA  
450 purification kit. 500ng of RNA (quantified on ThermoScientific Nanodrop 8000 spectrophotometer)  
451 was used to make cDNA using the Thermo Maxima First Strand cDNA synthesis kit for RT-qPCR  
452 with dsDNase. The RT-qPCR reaction was made for a Taqman assay using ThermoScientific  
453 DyNAmo Flash probe qPCR kit (10ul of mastermix, 0.1ul of each primer, 0.05ul of each probe,  
454 5ul of cDNA sample and 4.5ul of deionized H<sub>2</sub>O per reaction) and analyzed using the Applied  
455 Biosystems 7500 Real-Time system (cycling conditions: 95°C for 7 mins, 45 cycles of 95°C for 5  
456 seconds and 60°C for 30 seconds). Primer/probe sets for each target genes of *dnaE2*, *adnA* and  
457 *imuB* were combined with primer/ probe sets for *sigA* as the housekeeping gene and the analysis  
458 was done by comparing the  $\Delta\Delta CT$  for each treated strain to WT mc<sup>2</sup>155 untreated control. Each

459 cDNA sample was tested in duplicate and no RT control reactions were included in all RT-qPCR  
460 experiments to exclude spurious amplification of contaminating chromosomal DNA.

461 *M. tuberculosis* strains were grown to OD600 ~ 0.5 - 0.6, collected by centrifugation at  
462 3200G and re-suspended to OD600 = 0.6. For each treatment (0.5µg/ml Ciprofloxacin or 8ml  
463 culture exposed to ~20mJ/cm<sup>2</sup> UV), cultures with a final volume of 10ml were shaken at 37 °C  
464 /150RPM at a final OD600 = 0.3 (For UV, 5ml treated culture in 5ml of fresh media) for 24 hours,  
465 lysed in TRIzol reagent by bead beating 3 times for 45 seconds and processed using the Direct-  
466 zol Miniprep Plus kit. RNA was treated following the rigorous DNase treatment of the TURBO  
467 DNA-free kit. cDNA synthesis and RT-qPCR were similar to protocol used for *M. smegmatis* cells.  
468 Primers for RT-qPCR are in supplementary table 4.

469

470

#### 471 **Ribosomal RNA depletion and Transcriptional Profiling**

472 *M. smegmatis* and *M. tuberculosis* RNA samples for ciprofloxacin (0.5µg/ml for 3 hours (*M.*  
473 *smegmatis*) or 24 hours (*M. tuberculosis*)) or UV (20mJ/cm<sup>2</sup> with a recovery period of 1 hour  
474 (*M.smegmatis*) or 24 hours (*M. tuberculosis*) after exposure) transcriptional profiling by RNA  
475 sequencing were isolated from cells grown and treated as described above. The *M. smegmatis*  
476 RNA samples (n=2) were depleted for ribosomal RNA using a biotinylated oligonucleotides-based  
477 protocol (33). The *M. tuberculosis* RNA samples(n=1) were depleted for ribosomal RNA using the  
478 Illumina Ribozero Plus rRNA depletion kit. For both rRNA depletion methods, the efficiency of  
479 rRNA depletion was variable between samples with the percentage of reads mapped to rRNA  
480 after depletion ranging from 11% to 92%. Despite this variable rRNA depletion, all samples  
481 contained greater than 3 million non-ribosomal mapping transcripts. RNA sequencing was  
482 performed as previously reported (34).

483

#### 484 **DNA damage assays**

485 Strains were grown to saturation and were diluted to an OD600 = 0.02 and grown to OD600 ~0.6,  
486 collected by centrifugation at 3200G and resuspended to an OD600 = 0.6. For UV exposure, cells  
487 were serially diluted in PBS + 0.05% tween80 onto 7H10 agar plates. Agar plates were treated  
488 with the indicated doses of UV radiation with a Stratagene UV stratalinker 1800 with 254nm UV  
489 bulbs. Plates were wrapped in foil (to prevent potential effects of photolyase) and incubated at  
490 37°C. For treatment with ciprofloxacin (0.5µg/ml for 3 hours) and Mitomycin C (80ng/ml for 3  
491 hours), cultures were incubated at a final OD600 = 0.3. Cultures were washed with PBS + 0.05%  
492 tween80 and then were serially diluted in PBS + 0.05% tween80 onto 7H10 agar plates

493

#### 494 **Western Blot**

495 *M. smegmatis* lysates were prepared from cells exposed to ciprofloxacin (1.25 µg/ml for 1 and 3  
496 hours), UV (20mJ/cm<sup>2</sup> with a recovery period of 1 and 3 hours after exposure), Mitomycin C  
497 (80ng/ml for 2 and 5 hours), Anhydrotetracycline (ATc) (50ng/ml for described time), Cumene  
498 hydroxyperoxide (CHP) (50µm for 1 hour or 3 hours), SKI356313 (1.9µm for 1 hour or 3 hours) or  
499 Etoposide (24µm for 3 hours) by bead beating 2x for 30s (5-minute rest on ice between each  
500 cycle). Protein quantities were normalized using the Protein A280 on the Nanodrop 8000 and  
501 normalized to an apparent concentration of 0.2mg/ml. Blots were blocked and probed in 5%  
502 Omniblot milk in 1XPBST (Phosphate buffered saline + 0.01% tween20). Equal loading was  
503 confirmed with commercially available Biolegend *E. coli* anti-RpoB antibody (1:10,000 dilution) as  
504 a loading control. RecA antibody, raised in rabbits against purified full-length *M. smegmatis* RecA  
505 (8), was used at a 1:5,000 dilution. For RecA-streptag II (STII), STII (GenScript, Rabbit Anti-  
506 NWSHPQFEK polyclonal antibody) was used at a 1:5,000 dilution and the blots were blocked and  
507 probed in strep wash buffer (150mM NaCl, 100mM Tris PH 7.9/8, 1mM EDTA). LexA antibody,  
508 raised in rabbits against purified full-length *M. smegmatis* LexA, was used at a 1:2,000 dilution.  
509 Blots were imaged in iBright FL1000 and quantified using the iBright analysis software. *M.*  
510 *tuberculosis* lysates were prepared from cells exposed to ciprofloxacin (1.25 µg/ml for 24 hours)  
511 or UV (20mJ/cm<sup>2</sup> for 24 hours) by bead beating 3x for 45s. Blots were blocked and probed similarly  
512 to *M. smegmatis* samples.

513

#### 514 **UV induced Mutagenesis**

515 10 mL of each strain at OD<sub>600</sub> = 0.6 was transferred to Omnitray single-well plates (*M. smegmatis*)  
516 or extra depth disposable petri dish (*M. tuberculosis*) and exposed to 20 mJ/cm<sup>2</sup> UV radiation  
517 using a Stratagene UV stratalinker 1800. From each treated sample and its untreated control, 5  
518 mL of culture was transferred to 5 mL of fresh media and shaken at 37 °C /150 RPM for 3 hours  
519 (*M.smegmatis*) or 24 hours (*M.tuberculosis*). From each sample, a total of 5-9ml of culture was  
520 cultured as 400µl aliquots on 7H10 agar plates containing 0.5% glycerol, 0.5% dextrose, and 100  
521 µg/mL rifampicin and incubated at 37 °C for 72 hours (*M.smegmatis*) or 3 weeks (*M. tuberculosis*)  
522 to determine rifampicin-resistant CFU. Additional duplicates were taken from each sample and  
523 dilution-plated on 7H10 agar containing no antibiotic to determine viable CFU. Resistant mutants  
524 were then normalized to viable CFU for each set of samples. Graph represents average  
525 rifampicin-resistant mutants per viable CFU.

526

527 **Statistical analyses**

528 Significance tests were performed in GraphPad Prism using a two-way analysis of variance  
529 (ANOVA) test on log-transformed values. All performed statistical tests were two-sided. All error  
530 bars represent standard error of the mean (SEM), unless specifically noted otherwise.

531

532 **Data availability Statement**

533 RNA sequencing data has been deposited into into the SRA as BioProject# PRJNA746693.

534

535

536

537

538 **Figure legends**

539

540 **Figure 1- Genetic ablation of the PafBC and SOS pathways in *M. smegmatis* (A)** Confirmation  
541 of  $\Delta pafBC$  and *lexA*-S167A genotypes of *mc*<sup>2</sup>155 (WT),  $\Delta recA$ ,  $\Delta pafBC$ , *lexA*-S167A and  
542  $\Delta pafBC/lexA$ -S167A strains. The *pafBC* deletion allele was detected by PCR amplification with  
543 primers (OAM229 & OAM232) that amplify the genomic region upstream of *pafBC* yielding a product  
544 of 3059bp in strains carrying wild type *pafBC* and 1122bp in strains with  $\Delta pafBC$ . The *lexA*-S167A  
545 mutation was detected by selective amplification using primers (OAM189 & OAM268) that anneal to  
546 the mutated LexA, yielding a product of 234bp for *lexA*-S167A but no product from the wild type  
547 allele. L denotes the DNA ladder **(B)** LexA cleavage with DNA damage according to strain genotype.  
548  $\alpha$ -LexA immunoblot of mid-log phase expression of LexA (28kD, bottom panel) in *mc*<sup>2</sup>155,  $\Delta recA$ ,  
549  $\Delta pafBC$ , *lexA*-S167A and  $\Delta pafBC/lexA$ -S167A strains without (-) or with (+) DNA damage (20mJ/cm<sup>2</sup>  
550 UV). RpoB is shown as a loading control (top panel). **(C)** Schematic of *recA*-streptag (STII)  
551 expression construct containing the PafBC (P1) and LexA (P2) binding sites in the RecA promoter.  
552 *recA* promoter activity was measured by  $\alpha$ -streptag (STII) western blot of mid-log phase expression  
553 of RecA-STII (37kD) in *mc*<sup>2</sup>155,  $\Delta pafBC$ , *lexA*-S167A and,  $\Delta pafBC/lexA$ -S167A strains carrying  
554 RecA-STII driven only by the LexA repressed P2 (P1 mutated, **D**) or only the *pafBC* promoter (P2  
555 mutated, **E**) with or without DNA damage (UV 20mJ/cm<sup>2</sup> or ciprofloxacin (1.25 $\mu$ g/ml). RpoB is shown  
556 as a loading control for both blots in (D) and (E)  
557

558

559 **Figure 2- Relative contributions of PafBC or LexA to the transcriptional DNA damage**

560 **response in mycobacteria** Gene expression heatmaps of genes that are significantly

561 upregulated ( $\log_2$  fold change  $\geq 1.5$ , p-value  $< 0.01$ ) in WT *M. smegmatis* mc<sup>2</sup>155 by

562 ciprofloxacin (0.5 $\mu$ g/ml) or UV (20mJ/cm<sup>2</sup>) from transcriptomic profiling by RNA sequencing of

563 mc<sup>2</sup>155,  $\Delta recA$ ,  $\Delta pafBC$ , *lexA*-S167A and  $\Delta pafBC/lexA$ -S167A strains. **(A)** The RecA independent

564 PafBC regulon. The heat map displays genes in which DNA damage induced expression is

565 dependent on PafBC, but preserved in LexAS167A and  $\Delta recA$  strains. The scale bar depicts

566 normalized expression level. **(B)** Codependent and clastogen specific DDR. The red box

567 highlights genes that are RecA/SOS/PafBC dependent with cipro, but only SOS dependent with

568 UV. The blue boxes highlight PafBC/SOS codependent genes with cipro stress **(C)** Genes whose

569 DNA damage dependent expression levels are independent of either DDR pathway. **(D,E)** Venn

570 diagram categorizing genes for which the DNA damage induction is abolished (WT  $\log_2$  fold

571 change is  $>2.5x$  of the compared strain) in the indicated strain backgrounds ( $\Delta recA$ ,  $\Delta pafBC$ , *lexA*-

572 S167A and  $\Delta pafBC/lexA$ -S167A) compared to mc<sup>2</sup>155 with ciprofloxacin (D) or UV (E) treatment.

573 The genes represented in the Venn diagrams are the same genes represented in the heatmaps

574 in panels A-C.

575

576

577

578 **Figure 3- Gene and clastogen specific requirements for PafBC and LexA in the**  
579 **transcriptional DDR (A-C)** Normalized *adnA* mRNA measured by RT-qPCR in the indicated  
580 strains of *M. smegmatis* (black=wild type; orange= $\Delta recA$ , blue= $\Delta pafBC$ , purple=*lexAS167A*, and  
581 red= $\Delta pafBC/lexAS167A$ ) after exposure to either **(A)** UV (20mJ/cm<sup>2</sup>) (n= 3 biological replicates)  
582 **(B)** ciprofloxacin (0.5 $\mu$ g/ml) (n = 5 biological replicates) or **(C)** Mitomycin C (MMC) (80ng/ml) (n =  
583 3 biological replicates). All values are normalized to WT untreated at 1. **(D)** Genetic  
584 complementation. Normalized *adnA* mRNA measured by RT-qPCR in *M. smegmatis*  $\Delta pafBC$   
585 complemented with either *M. tuberculosis pafBC*, *M. smegmatis pafBC* or empty vector (EV) after  
586 exposure to UV (20mJ/cm<sup>2</sup>) (n = 2 biological replicates). All values are normalized to *M.*  
587 *smegmatis*  $\Delta pafBC$  complemented with *M. smegmatis pafBC* **(E-G)** Normalized *dnaE2* mRNA  
588 measured by RT-qPCR in the same *M. smegmatis* strains as in (A-C) after exposure to either **(E)**  
589 UV (20mJ/cm<sup>2</sup>) (n= 3 biological replicates) **(F)** ciprofloxacin (0.5 $\mu$ g/ml) (n = 5 biological replicates)  
590 or **(G)** MMC (80ng/ml) (n = 3 biological replicates). All values are normalized to WT untreated at  
591 1 **(H)** Normalized *dnaE2* mRNA in *M. smegmatis*  $\Delta pafBC$  strains complemented with either  
592 *M.tuberculosis pafBC*, *M.smegmatis pafBC* or empty vector (EV) (same strain legend as in panel  
593 D) after exposure to UV (20mJ/cm<sup>2</sup>) (n = 2 biological replicates). All values are normalized to *M.*  
594 *smegmatis*  $\Delta pafBC$  complemented with *M.smegmatis pafBC* untreated at 1 **(I-J)** Normalized  
595 mRNA measured by RT-qPCR for **(I)** *adnA* or **(J)** *dnaE2* in *M. tuberculosis* H37Rv, H37Rv  
596 *pafC::tn*, *pafC::tn +pafC*. All values are normalized to WT untreated at 1. Significance is calculated  
597 as \*= p < 0.05 using 2-way ANOVA compared to the WT strain (mc<sup>2</sup>155 or H37Rv) at a  
598 comparable timepoint/condition. \* = p < 0.05 using 2-way ANOVA compared to *lexAS167A* strain  
599 at a comparable timepoint/condition. Error bars are SEM

600



601  
602 **Figure 4- Functional outputs of the DDR are codependent on LexA and PafBC** Survival of  
603 mc<sup>2</sup>155 (black),  $\Delta recA$  (orange),  $\Delta pafBC$  (blue), *lexAS167A* (purple) and  $\Delta pafBC/lexA-S167A$   
604 (red) after exposure to **(A)** UV (0, 5, 10 or 20mJ/cm<sup>2</sup>) (n = 4 biological replicates) **(B)** ciprofloxacin  
605 (0.5µg/ml) (n = 4 biological replicates) or **(C)** MMC (80ng/ml) (n = 5 biological replicates) **(D)**  
606 Survival of  $\Delta pafBC$  strains complemented with either *M. tuberculosis pafBC*, *M. smegmatis pafBC*  
607 or empty vector (EV) and mc<sup>2</sup>155 complemented with EV after exposure to UV (20mJ/cm<sup>2</sup>) (n =  
608 2 biological replicates). Significance is calculated as \*= p < 0.05 using 2-way ANOVA compared  
609 to the WT strain at a comparable timepoint/condition. ‡= p < 0.05 using 2-way ANOVA compared  
610 to *lexAS167A* strain at a comparable timepoint/condition. Error bars are SEM

611

612

613  
614  
615  
616  
617  
618  
619  
620  
621  
622  
623  
624  
625  
626  
627  
628  
629  
630  
631

**Figure 5- Mycobacterial mutagenesis requires both SOS and PafBC (A)** Frequency of rifampin resistant mutants per  $10^8$  cells in *M. smegmatis* mc<sup>2</sup>155,  $\Delta recA$ ,  $\Delta pafBC$ , *lexA-S167A* and  $\Delta pafBC/lexAS167A$  with or without DNA damage (20mJ/cm<sup>2</sup> UV) (n= 4 biological replicates). # indicates that no Rif<sup>R</sup> colonies were recovered **(B)** Frequency of rifampin resistant mutants per  $10^8$  cells in WT *M.smegmatis*,  $\Delta pafBC$  or  $\Delta pafBC$  complemented with *M.smegmatis pafBC* after exposure to UV (20mJ/cm<sup>2</sup>) (n = 2 biological replicates) **(C)** *pafBC* is required for mutagenesis in *M. tuberculosis*. Frequency of rifampin resistance per  $10^8$  cells in *M. tuberculosis* strains of H37Rv, transposon insertion mutant of *pafC* (*pafC* TN) and transposon insertion mutant of *pafC* complemented with *pafC* (*pafC* comp) with or without DNA damage (20mJ/cm<sup>2</sup> UV) (n= 6 biological replicates) **(D)** Normalized *imuB* mRNA measured by RT-qPCR in the indicated strains of *M. smegmatis* after exposure to either UV (20mJ/cm<sup>2</sup>) (n=3 biological replicates) or ciprofloxacin (0.5 $\mu$ g/ml) (n = 3 biological replicates). All values are normalized to WT untreated at 1 **(E)** Normalized *imuB* mRNA measured by RT-qPCR in the indicated strains of *M. tuberculosis* after exposure to either UV (20mJ/cm<sup>2</sup>) (n= 4 biological replicates) or ciprofloxacin (0.5 $\mu$ g/ml) (n = 4 biological replicates). All values are normalized to WT untreated at 1. Significance is calculated as \*= p < 0.05 using 2-way ANOVA compared to WT untreated. Error bars are SEM

632

633 **Figure 6- Ciprofloxacin is a selective inducer of the PafBC pathway**  $\alpha$ -RecA western blot of  
634 mid-log phase expression of RecA (37kD) in *M. smegmatis* WT,  $\Delta$ *pafBC* and *lexAS167A* after  
635 exposure to **(A)** UV (20mJ/cm<sup>2</sup> with a recovery period of 1 hour or 3 hours after exposure), **(B)**  
636 ciprofloxacin (1.25 $\mu$ g/ml for 1 hour or 3 hours) or **(C)** MMC (80ng/ml for 2 hours or 5 hours). RpoB  
637 is shown as a loading control. Quantification of RecA levels normalized to RpoB levels from 3  
638 biological replicates for each of the DNA damaging agents is shown in the right panels of **(A)**, **(B)**  
639 and **(C)**. All RpoB normalized RecA levels are displayed as a percentage of WT untreated set at  
640 100%. Significance is calculated as \*= p < 0.05 using 2-way ANOVA compared to mc<sup>2</sup>155 at a  
641 comparable timepoint/condition. Error bars are SEM **(D)**  $\alpha$ -RecA immunoblot of mid-log phase  
642 expression of RecA (37kD) in *M. smegmatis*  $\Delta$ *pafBC* complemented with either *M. tuberculosis*  
643 *pafBC*, *M. smegmatis* *pafBC* or empty vector (EV) after exposure to UV (20mJ/cm<sup>2</sup>) or  
644 ciprofloxacin (1.25 $\mu$ g/ml) after 3 hours **(E)**  $\alpha$ -RecA western blot of mid-log phase expression of  
645 RecA (37kD) in *M. tuberculosis* strains of WT H37Rv, transposon insertion mutant of *pafC* (*pafC*  
646 TN) and transposon insertion mutant of *pafC* complemented with *pafC* (*pafC* comp) after  
647 exposure to UV (20mJ/cm<sup>2</sup> with a recovery period of 24 hours after exposure) or ciprofloxacin  
648 (1.25 $\mu$ g/ml for 24 hours). RpoB is shown as a loading control  
649

650

651 **Figure 7- Inhibition of DNA replisome function selectively induces the PafBC pathway  $\alpha$ -**

652 RecA immunoblot of mid-log phase expression of RecA (37kb) in *mc<sup>2</sup>155*,  $\Delta$ *pafBC* and *lexAS167A*

653 strains after exposure to **(A)** cumene hydroperoxide (CHP, 50 $\mu$ M for 1 hour or 3 hours) **(B)**

654 SKI356313 (1.9 $\mu$ M for 1 hour or 3 hours) **(C)** Etoposide (24 $\mu$ M for 3 hours) **(D)** ATc induced

655 overexpression of DinB1 for 4 hours or 6 hours **(E)** ATc induced overexpression of DinB1 missing

656 the beta-clamp interaction domain (DinB1- $\Delta$ 356-360) for 4 hours or 6 hours or **(F)** ATc induced

657 overexpression of polymerase-dead DinB1 (*dinB1-D113A*) for 4 hours or 6 hours.

658

659

660

661 **References**

662

663

664

665 1. Nathan, C. and Shiloh, M.U. (2000) Reactive oxygen and nitrogen intermediates in the  
666 relationship between mammalian hosts and microbial pathogens. *Proc Natl Acad Sci U S*  
667 *A*, **97**, 8841-8848.

668 2. Warner, D.F. and Mizrahi, V. (2006) Tuberculosis chemotherapy: the influence of bacillary  
669 stress and damage response pathways on drug efficacy. *Clin Microbiol Rev*, **19**, 558-570.

670 3. Darwin, K.H. and Nathan, C.F. (2005) Role for nucleotide excision repair in virulence of  
671 *Mycobacterium tuberculosis*. *Infect Immun*, **73**, 4581-4587.

672 4. Houghton, J., Townsend, C., Williams, A.R., Rodgers, A., Rand, L., Walker, K.B., Bottger,  
673 E.C., Springer, B. and Davis, E.O. (2012) Important role for *Mycobacterium tuberculosis*  
674 UvrD1 in pathogenesis and persistence apart from its function in nucleotide excision  
675 repair. *J Bacteriol*, **194**, 2916-2923.

676 5. Naz, S., Dabral, S., Nagarajan, S.N., Arora, D., Singh, L.V., Kumar, P., Singh, Y., Kumar,  
677 D., Varshney, U. and Nandicoori, V.K. (2021) Compromised base excision repair pathway  
678 in *Mycobacterium tuberculosis* imparts superior adaptability in the host. *PLOS Pathogens*,  
679 **17**, e1009452.

680 6. Dos Vultos, T., Mestre, O., Tonjum, T. and Gicquel, B. (2009) DNA repair in  
681 *Mycobacterium tuberculosis* revisited. *FEMS Microbiol Rev*, **33**, 471-487.

682 7. Yu, X. and Egelman, E.H. (1993) The LexA repressor binds within the deep helical groove  
683 of the activated RecA filament. *J Mol Biol*, **231**, 29-40.

684 8. Wipperman, M.F., Heaton, B.E., Nautiyal, A., Adefisayo, O., Evans, H., Gupta, R., van  
685 Ditmarsch, D., Soni, R., Hendrickson, R., Johnson, J. *et al.* (2018) *Mycobacterial*  
686 *Mutagenesis and Drug Resistance Are Controlled by Phosphorylation- and Cardiolipin-*  
687 *Mediated Inhibition of the RecA Coprotease.* *Mol Cell*, **72**, 152-161.e157.

- 688 9. Nautiyal, A., Patil, K.N. and Muniyappa, K. (2014) Suramin is a potent and selective  
689 inhibitor of Mycobacterium tuberculosis RecA protein and the SOS response: RecA as a  
690 potential target for antibacterial drug discovery. *J Antimicrob Chemother*, **69**, 1834-1843.
- 691 10. Müller, A.U., Imkamp, F. and Weber-Ban, E. (2018) The Mycobacterial LexA/RecA-  
692 Independent DNA Damage Response Is Controlled by PafBC and the Pup-Proteasome  
693 System. *Cell Rep*, **23**, 3551-3564.
- 694 11. Festa, R.A., Pearce, M.J. and Darwin, K.H. (2007) Characterization of the proteasome  
695 accessory factor (paf) operon in Mycobacterium tuberculosis. *J Bacteriol*, **189**, 3044-3050.
- 696 12. Rand, L., Hinds, J., Springer, B., Sander, P., Buxton, R.S. and Davis, E.O. (2003) The  
697 majority of inducible DNA repair genes in Mycobacterium tuberculosis are induced  
698 independently of RecA. *Mol Microbiol*, **50**, 1031-1042.
- 699 13. Brzostek, A., Płociński, P., Minias, A., Ciszewska, A., Gąsior, F., Pawełczyk, J., Dziadek,  
700 B., Słomka, M. and Dziadek, J. (2021) Dissecting the RecA-(In)dependent Response to  
701 Mitomycin C in. *Cells*, **10**.
- 702 14. Podlesek, Z. and Žgur Bertok, D. (2020) The DNA Damage Inducible SOS Response Is a  
703 Key Player in the Generation of Bacterial Persister Cells and Population Wide Tolerance.  
704 *Front Microbiol*, **11**, 1785.
- 705 15. Boshoff, H.I., Reed, M.B., Barry, C.E. and Mizrahi, V. (2003) DnaE2 polymerase  
706 contributes to in vivo survival and the emergence of drug resistance in Mycobacterium  
707 tuberculosis. *Cell*, **113**, 183-193.
- 708 16. Cox, M.M. (2007) Regulation of bacterial RecA protein function. *Crit Rev Biochem Mol*  
709 *Biol*, **42**, 41-63.
- 710 17. Gopaul, K.K., Brooks, P.C., Prost, J.F. and Davis, E.O. (2003) Characterization of the two  
711 Mycobacterium tuberculosis recA promoters. *J Bacteriol*, **185**, 6005-6015.
- 712 18. Gupta, R., Barkan, D., Redelman-Sidi, G., Shuman, S. and Glickman, M.S. (2011)  
713 Mycobacteria exploit three genetically distinct DNA double-strand break repair pathways.  
714 *Mol Microbiol*, **79**, 316-330.

- 715 19. Michel, B., Sinha, A.K. and Leach, D.R.F. (2018) Replication Fork Breakage and Restart  
716 in Escherichia coli. *Microbiol Mol Biol Rev*, **82**.
- 717 20. Barkan, D., Stallings, C.L. and Glickman, M.S. (2011) An improved counterselectable  
718 marker system for mycobacterial recombination using galk and 2-deoxy-galactose. *Gene*,  
719 **470**, 31-36.
- 720 21. Bell, J.C. and Kowalczykowski, S.C. (2016) RecA: Regulation and Mechanism of a  
721 Molecular Search Engine: (Trends in Biochemical Sciences, June 2016, Vol. 41, No. 6,  
722 491--507). *Trends Biochem Sci*, **41**, 646.
- 723 22. Slilaty, S.N. and Little, J.W. (1987) Lysine-156 and serine-119 are required for LexA  
724 repressor cleavage: a possible mechanism. *Proc Natl Acad Sci U S A*, **84**, 3987-3991.
- 725 23. Warner, D.F., Ndwandwe, D.E., Abrahams, G.L., Kana, B.D., Machowski, E.E.,  
726 Venclovas, C. and Mizrahi, V. (2010) Essential roles for imuA'- and imuB-encoded  
727 accessory factors in DnaE2-dependent mutagenesis in Mycobacterium tuberculosis. *Proc*  
728 *Natl Acad Sci U S A*, **107**, 13093-13098.
- 729 24. Müller, A.U., Leibundgut, M., Ban, N. and Weber-Ban, E. (2019) Structure and functional  
730 implications of WYL domain-containing bacterial DNA damage response regulator PafBC.  
731 *Nat Commun*, **10**, 4653.
- 732 25. Harris, K.K., Fay, A., Yan, H.G., Kunwar, P., Socci, N.D., Pottabathini, N., Juvenhala,  
733 R.R., Djaballah, H. and Glickman, M.S. (2014) Novel imidazoline antimicrobial scaffold  
734 that inhibits DNA replication with activity against mycobacteria and drug resistant Gram-  
735 positive cocci. *ACS Chem Biol*, **9**, 2572-2583.
- 736 26. Chatterji, M., Unniraman, S., Mahadevan, S. and Nagaraja, V. (2001) Effect of different  
737 classes of inhibitors on DNA gyrase from Mycobacterium smegmatis. *J Antimicrob*  
738 *Chemother*, **48**, 479-485.
- 739 27. Kana, B.D., Abrahams, G.L., Sung, N., Warner, D.F., Gordhan, B.G., Machowski, E.E.,  
740 Tsenova, L., Sacchettini, J.C., Stoker, N.G., Kaplan, G. *et al.* (2010) Role of the DinB  
741 homologs Rv1537 and Rv3056 in Mycobacterium tuberculosis. *J Bacteriol*, **192**, 2220-  
742 2227.



- 743 28. Dorman, S.E., Nahid, P., Kurbatova, E.V., Phillips, P.P.J., Bryant, K., Dooley, K.E., Engle,  
744 M., Goldberg, S.V., Phan, H.T.T., Hakim, J. *et al.* (2021) Four-Month Rifapentine  
745 Regimens with or without Moxifloxacin for Tuberculosis. *N Engl J Med*, **384**, 1705-1718.
- 746 29. Thi, T.D., López, E., Rodríguez-Rojas, A., Rodríguez-Beltrán, J., Couce, A., Guelfo, J.R.,  
747 Castañeda-García, A. and Blázquez, J. (2011) Effect of *recA* inactivation on mutagenesis  
748 of *Escherichia coli* exposed to sublethal concentrations of antimicrobials. *J Antimicrob*  
749 *Chemother*, **66**, 531-538.
- 750 30. Dawson, L.F., Dillury, J. and Davis, E.O. (2010) RecA-independent DNA damage  
751 induction of *Mycobacterium tuberculosis* *ruvC* despite an appropriately located SOS box.  
752 *J Bacteriol*, **192**, 599-603.
- 753 31. Davis, E.O., Springer, B., Gopaul, K.K., Papavinasasundaram, K.G., Sander, P. and  
754 Bottger, E.C. (2002) DNA damage induction of *recA* in *Mycobacterium tuberculosis*  
755 independently of RecA and LexA. *Mol Microbiol*, **46**, 791-800.
- 756 32. Gupta, R., Unciuleac, M.C., Shuman, S. and Glickman, M.S. (2017) Homologous  
757 recombination mediated by the mycobacterial AdnAB helicase without end resection by  
758 the AdnAB nucleases. *Nucleic Acids Res*, **45**, 762-774.
- 759 33. Culviner, P.H., Guegler, C.K. and Laub, M.T. (2020) A Simple, Cost-Effective, and Robust  
760 Method for rRNA Depletion in RNA-Sequencing Studies. *mBio*, **11**.
- 761 34. Hubin, E.A., Fay, A., Xu, C., Bean, J.M., Saecker, R.M., Glickman, M.S., Darst, S.A. and  
762 Campbell, E.A. (2017) Structure and function of the mycobacterial transcription initiation  
763 complex with the essential regulator RbpA. *Elife*, **6**.
- 764

- 739 28. Dorman, S.E., Nahid, P., Kurbatova, E.V., Phillips, P.P.J., Bryant, K., Dooley, K.E., Engle,  
740 M., Goldberg, S.V., Phan, H.T.T., Hakim, J. *et al.* (2021) Four-Month Rifapentine  
741 Regimens with or without Moxifloxacin for Tuberculosis. *N Engl J Med*, **384**, 1705-1718.
- 742 29. Thi, T.D., López, E., Rodríguez-Rojas, A., Rodríguez-Beltrán, J., Couce, A., Guelfo, J.R.,  
743 Castañeda-García, A. and Blázquez, J. (2011) Effect of *recA* inactivation on mutagenesis  
744 of *Escherichia coli* exposed to sublethal concentrations of antimicrobials. *J Antimicrob*  
745 *Chemother*, **66**, 531-538.
- 746 30. Dawson, L.F., Dillury, J. and Davis, E.O. (2010) RecA-independent DNA damage  
747 induction of *Mycobacterium tuberculosis* *ruvC* despite an appropriately located SOS box.  
748 *J Bacteriol*, **192**, 599-603.
- 749 31. Davis, E.O., Springer, B., Gopaul, K.K., Papavinasasundaram, K.G., Sander, P. and  
750 Bottger, E.C. (2002) DNA damage induction of *recA* in *Mycobacterium tuberculosis*  
751 independently of RecA and LexA. *Mol Microbiol*, **46**, 791-800.
- 752 32. Gupta, R., Unciuleac, M.C., Shuman, S. and Glickman, M.S. (2017) Homologous  
753 recombination mediated by the mycobacterial AdnAB helicase without end resection by  
754 the AdnAB nucleases. *Nucleic Acids Res*, **45**, 762-774.
- 755 33. Culviner, P.H., Guegler, C.K. and Laub, M.T. (2020) A Simple, Cost-Effective, and Robust  
756 Method for rRNA Depletion in RNA-Sequencing Studies. *mBio*, **11**.
- 757 34. Hubin, E.A., Fay, A., Xu, C., Bean, J.M., Saecker, R.M., Glickman, M.S., Darst, S.A. and  
758 Campbell, E.A. (2017) Structure and function of the mycobacterial transcription initiation  
759 complex with the essential regulator RbpA. *Elife*, **6**.
- 760

534 **Figure legends**

535

536 **Figure 1- Genetic ablation of the PafBC and SOS pathways in *M. smegmatis* (A)** Confirmation  
537 of  $\Delta pafBC$  and *lexA*-S167A genotypes of mc<sup>2</sup>155 (WT),  $\Delta recA$ ,  $\Delta pafBC$ , *lexA*-S167A and  
538  $\Delta pafBC/lexA$ -S167A strains. The *pafBC* deletion allele was detected by PCR amplification with  
539 primers (OAM229 & OAM232) that amplify the genomic region upstream of *pafBC* yielding a product  
540 of 3059bp in strains carrying wild type *pafBC* and 1122bp in strains with  $\Delta pafBC$ . The *lexA*-S167A  
541 mutation was detected by selective amplification using primers (OAM189 & OAM268) that anneal to  
542 the mutated LexA, yielding a product of 234bp for *lexA*-S167A but no product from the wild type  
543 allele. L denotes the DNA ladder **(B)** LexA cleavage with DNA damage according to strain genotype.  
544  $\alpha$ -LexA immunoblot of mid-log phase expression of LexA (28kD, bottom panel) in mc<sup>2</sup>155,  $\Delta recA$ ,  
545  $\Delta pafBC$ , *lexA*-S167A and  $\Delta pafBC/lexA$ -S167A strains without (-) or with (+) DNA damage (20mJ/cm<sup>2</sup>  
546 UV). RpoB is shown as a loading control (top panel). **(C)** Schematic of *recA*-streptag (STII)  
547 expression construct containing the PafBC (P1) and LexA (P2) binding sites in the RecA promoter.  
548 *recA* promoter activity was measured by  $\alpha$ -streptag (STII) western blot of mid-log phase expression  
549 of RecA-STII (37kD) in mc<sup>2</sup>155,  $\Delta pafBC$ , *lexA*-S167A and,  $\Delta pafBC/lexA$ -S167A strains carrying  
550 RecA-STII driven only by the LexA repressed P2 (P1 mutated, **D**) or only the *pafBC* promoter (P2  
551 mutated, **E**) with or without DNA damage (UV 20mJ/cm<sup>2</sup> or ciprofloxacin (1.25 $\mu$ g/ml). RpoB is shown  
552 as a loading control for both blots in (D) and (E)  
553

**A**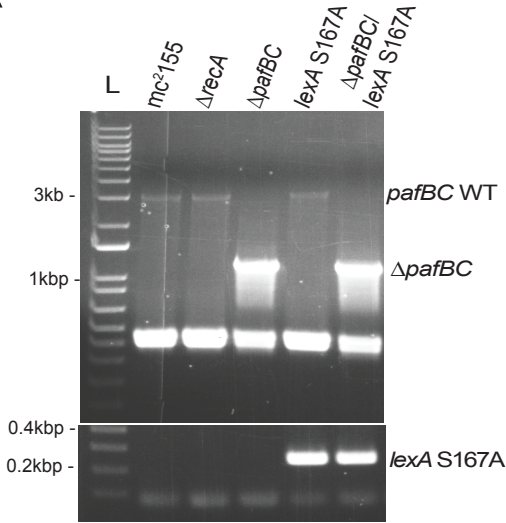**B**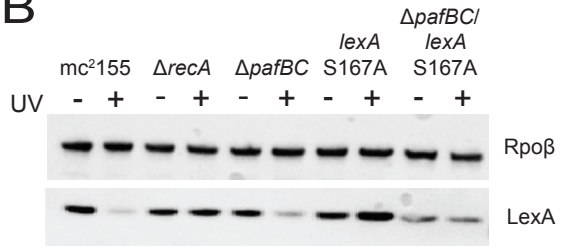**C**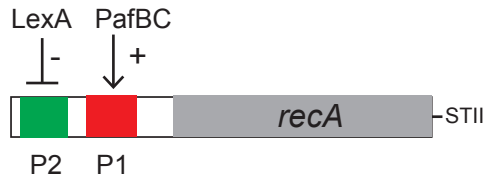**D LexA (P2) intact**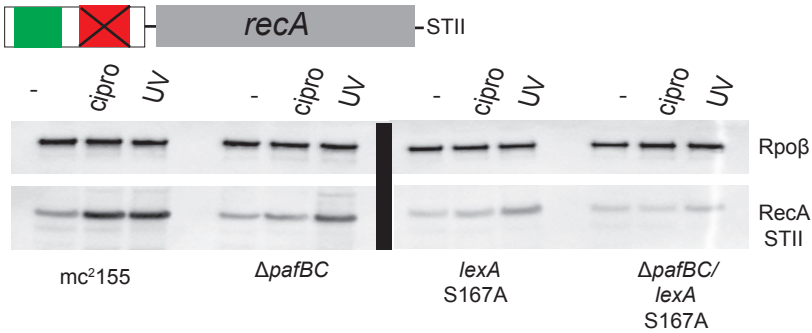**E PafBC (P1) intact**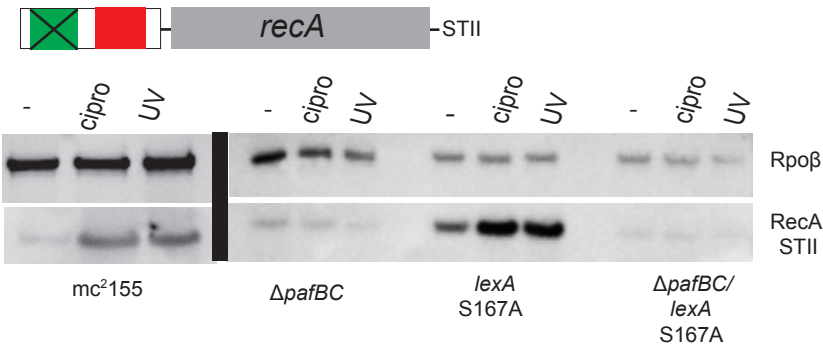

Figure 1

554

555 **Figure 2- Relative contributions of PafBC or LexA to the transcriptional DNA damage**

556 **response in mycobacteria** Gene expression heatmaps of genes that are significantly  
557 upregulated ( $\log_2$  fold change  $\geq 1.5$ , p-value  $< 0.01$ ) in WT *M. smegmatis* mc<sup>2</sup>155 by  
558 ciprofloxacin (0.5 $\mu$ g/ml) or UV (20mJ/cm<sup>2</sup>) from transcriptomic profiling by RNA sequencing of  
559 mc<sup>2</sup>155,  $\Delta$ recA,  $\Delta$ pafBC, *lexA*-S167A and  $\Delta$ pafBC/*lexA*-S167A strains. **(A)** The RecA independent  
560 PafBC regulon. The heat map displays genes in which DNA damage induced expression is  
561 dependent on PafBC, but preserved in *lexA*S167A and  $\Delta$ recA strains. The scale bar depicts  
562 normalized expression level. **(B)** Codependent and clastogen specific DDR. The red box  
563 highlights genes that are RecA/SOS/PafBC dependent with cipro, but only SOS dependent with  
564 UV. The blue boxes highlight PafBC/SOS codependent genes with cipro stress **(C)** Genes whose  
565 DNA damage dependent expression levels are independent of either DDR pathway. **(D,E)** Venn  
566 diagram categorizing genes for which the DNA damage induction is abolished (WT  $\log_2$  fold  
567 change is  $>2.5$ x of the compared strain) in the indicated strain backgrounds ( $\Delta$ recA,  $\Delta$ pafBC, *lexA*-  
568 S167A and  $\Delta$ pafBC/*lexA*-S167A) compared to mc<sup>2</sup>155 with ciprofloxacin (D) or UV (E) treatment.  
569 The genes represented in the Venn diagrams are the same genes represented in the heatmaps  
570 in panels A-C.

571

572

A

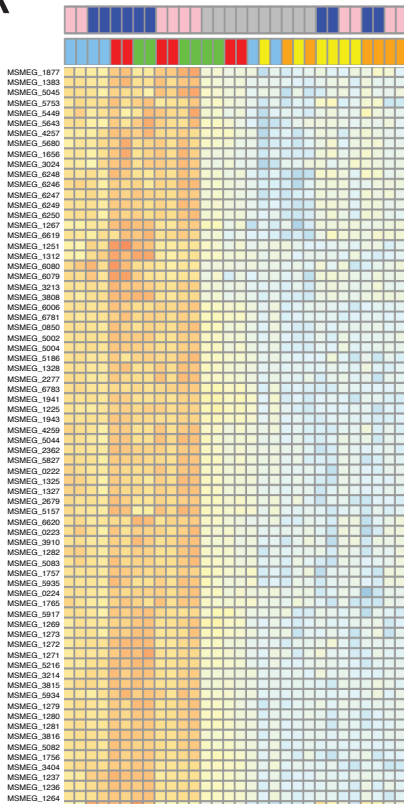

B

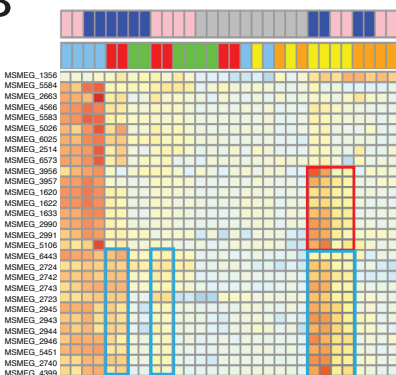

C

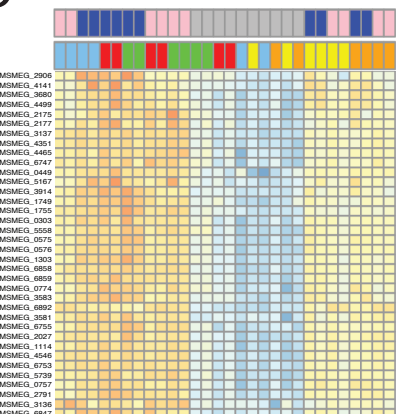

D

Ciprofloxacin

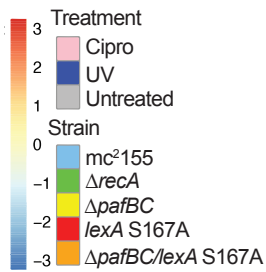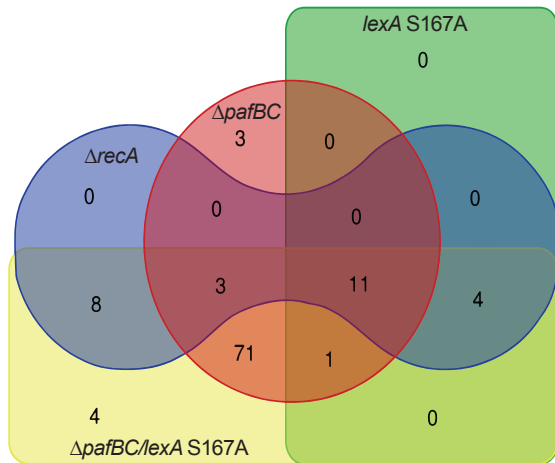

E

UV

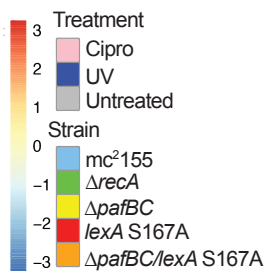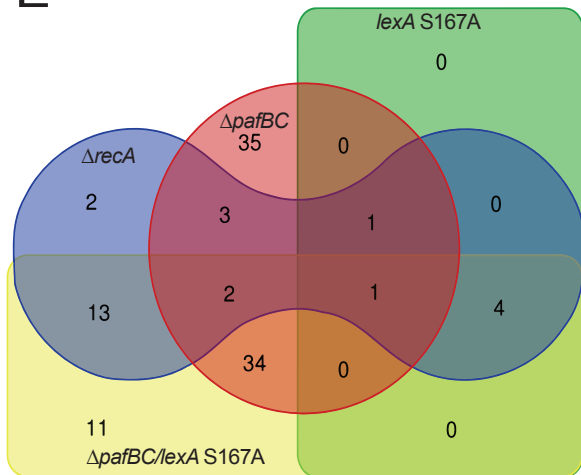

Figure 2

573  
574  
575  
576  
577  
578  
579  
580  
581  
582  
583  
584  
585  
586  
587  
588  
589  
590  
591  
592  
593  
594  
595  
596

**Figure 3- Gene and clastogen specific requirements for PafBC and LexA in the transcriptional DDR (A-C)** Normalized *adnA* mRNA measured by RT-qPCR in the indicated strains of *M. smegmatis* (black=wild type; orange= $\Delta recA$ , blue= $\Delta pafBC$ , purple=*lexAS167A*, and red= $\Delta pafBC/lexAS167A$ ) after exposure to either **(A)** UV (20mJ/cm<sup>2</sup>) (n= 3 biological replicates) **(B)** ciprofloxacin (0.5 $\mu$ g/ml) (n = 5 biological replicates) or **(C)** Mitomycin C (MMC) (80ng/ml) (n = 3 biological replicates). All values are normalized to WT untreated at 1. **(D)** Genetic complementation. Normalized *adnA* mRNA measured by RT-qPCR in *M. smegmatis*  $\Delta pafBC$  complemented with either *M. tuberculosis pafBC*, *M. smegmatis pafBC* or empty vector (EV) after exposure to UV (20mJ/cm<sup>2</sup>) (n = 2 biological replicates). All values are normalized to *M. smegmatis*  $\Delta pafBC$  complemented with *M. smegmatis pafBC* **(E-G)** Normalized *dnaE2* mRNA measured by RT-qPCR in the same *M. smegmatis* strains as in (A-C) after exposure to either **(E)** UV (20mJ/cm<sup>2</sup>) (n= 3 biological replicates) **(F)** ciprofloxacin (0.5 $\mu$ g/ml) (n = 5 biological replicates) or **(G)** MMC (80ng/ml) (n = 3 biological replicates). All values are normalized to WT untreated at 1 **(H)** Normalized *dnaE2* mRNA in *M. smegmatis*  $\Delta pafBC$  strains complemented with either *M.tuberculosis pafBC*, *M.smegmatis pafBC* or empty vector (EV) (same strain legend as in panel D) after exposure to UV (20mJ/cm<sup>2</sup>) (n = 2 biological replicates). All values are normalized to *M. smegmatis*  $\Delta pafBC$  complemented with *M.smegmatis pafBC* untreated at 1 **(I-J)** Normalized mRNA measured by RT-qPCR for **(I)** *adnA* or **(J)** *dnaE2* in *M. tuberculosis* H37Rv, H37Rv *pafC::tn*, *pafC::tn +pafC*. All values are normalized to WT untreated at 1. Significance is calculated as \*= p < 0.05 using 2-way ANOVA compared to the WT strain (mc<sup>2</sup>155 or H37Rv) at a comparable timepoint/condition. \* = p < 0.05 using 2-way ANOVA compared to *lexAS167A* strain at a comparable timepoint/condition. Error bars are SEM



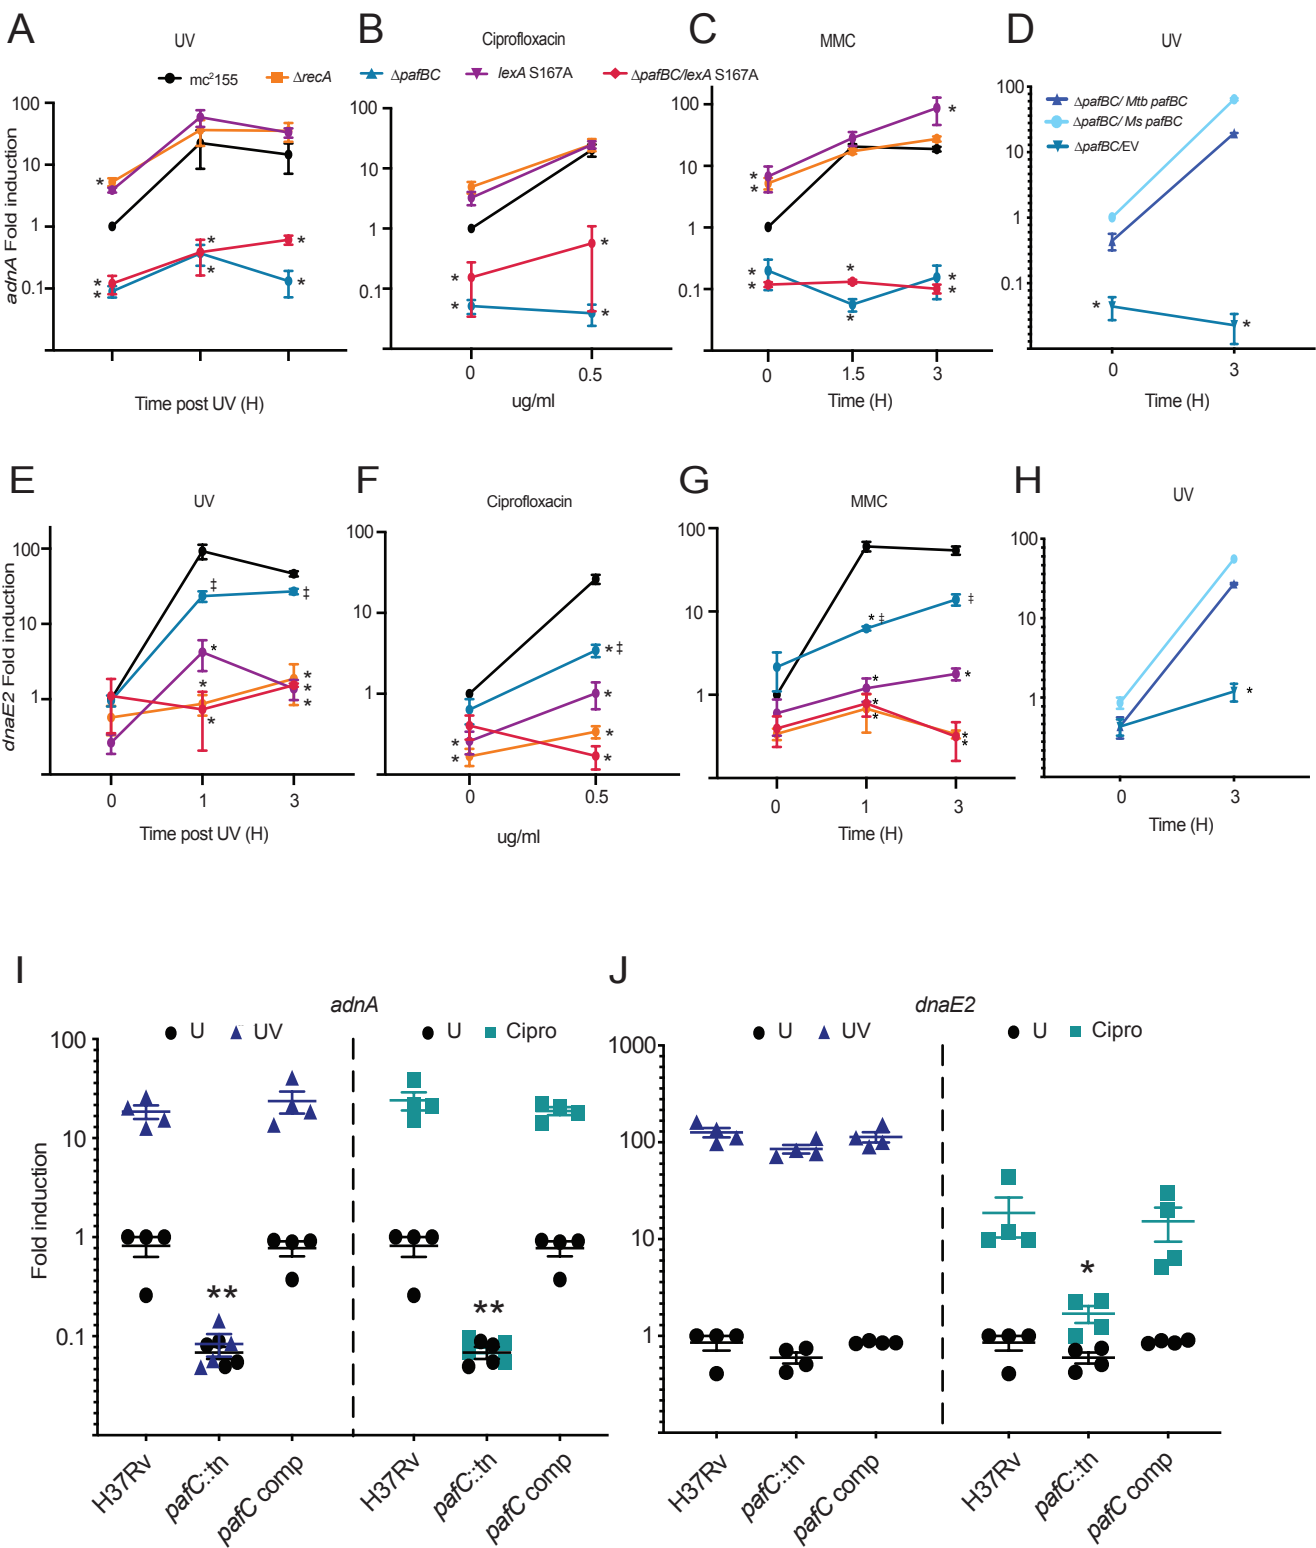

Figure 3

597

598 **Figure 4- Functional outputs of the DDR are codependent on LexA and PafBC** Survival of  
599 *mc*<sup>2</sup>155 (black),  $\Delta$ *recA* (orange),  $\Delta$ *pafBC* (blue), *lexAS167A* (purple) and  $\Delta$ *pafBC/lexA-S167A*  
600 (red) after exposure to **(A)** UV (0, 5, 10 or 20mJ/cm<sup>2</sup>) (n = 4 biological replicates) **(B)** ciprofloxacin  
601 (0.5µg/ml) (n = 4 biological replicates) or **(C)** MMC (80ng/ml) (n = 5 biological replicates) **(D)**  
602 Survival of  $\Delta$ *pafBC* strains complemented with either *M. tuberculosis pafBC*, *M. smegmatis pafBC*  
603 or empty vector (EV) and *mc*<sup>2</sup>155 complemented with EV after exposure to UV (20mJ/cm<sup>2</sup>) (n =  
604 2 biological replicates). Significance is calculated as \*= p < 0.05 using 2-way ANOVA compared  
605 to the WT strain at a comparable timepoint/condition. ‡= p < 0.05 using 2-way ANOVA compared  
606 to *lexAS167A* strain at a comparable timepoint/condition. Error bars are SEM

607

608

A

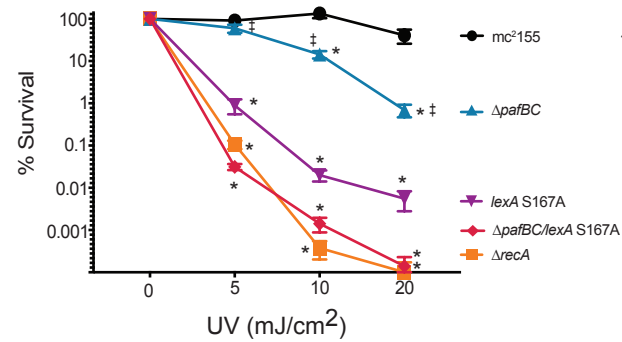

B

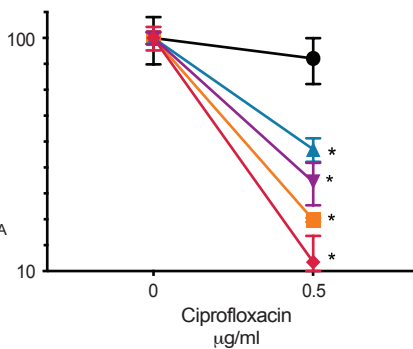

C

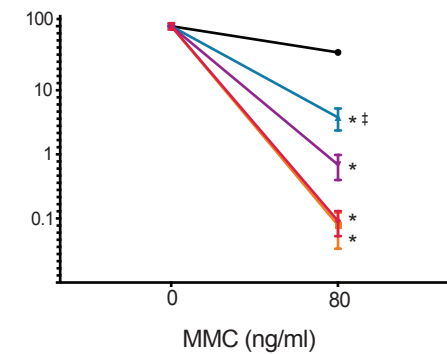

D

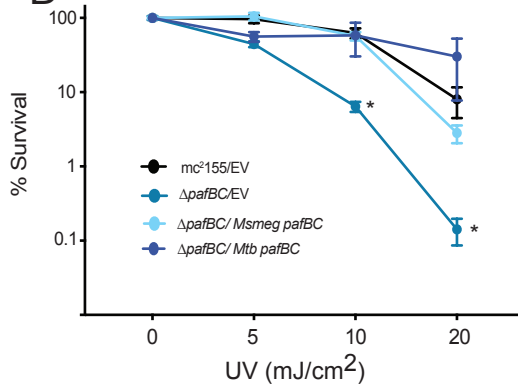

Figure 4

609  
610  
611  
612  
613  
614  
615  
616  
617  
618  
619  
620  
621  
622  
623  
624  
625  
626  
627

**Figure 5- Mycobacterial mutagenesis requires both SOS and PafBC (A)** Frequency of rifampin resistant mutants per  $10^8$  cells in *M. smegmatis* mc<sup>2</sup>155,  $\Delta recA$ ,  $\Delta pafBC$ , *lexA-S167A* and  $\Delta pafBC/lexAS167A$  with or without DNA damage (20mJ/cm<sup>2</sup> UV) (n= 4 biological replicates). # indicates that no Rif<sup>R</sup> colonies were recovered **(B)** Frequency of rifampin resistant mutants per  $10^8$  cells in WT *M. smegmatis*,  $\Delta pafBC$  or  $\Delta pafBC$  complemented with *M. smegmatis pafBC* after exposure to UV (20mJ/cm<sup>2</sup>) (n = 2 biological replicates) **(C)** *pafBC* is required for mutagenesis in *M. tuberculosis*. Frequency of rifampin resistance per  $10^8$  cells in *M. tuberculosis* strains of H37Rv, transposon insertion mutant of *pafC* (*pafC* TN) and transposon insertion mutant of *pafC* complemented with *pafC* (*pafC* comp) with or without DNA damage (20mJ/cm<sup>2</sup> UV) (n= 6 biological replicates) **(D)** Normalized *imuB* mRNA measured by RT-qPCR in the indicated strains of *M. smegmatis* after exposure to either UV (20mJ/cm<sup>2</sup>) (n=3 biological replicates) or ciprofloxacin (0.5 $\mu$ g/ml) (n = 3 biological replicates). All values are normalized to WT untreated at 1 **(E)** Normalized *imuB* mRNA measured by RT-qPCR in the indicated strains of *M. tuberculosis* after exposure to either UV (20mJ/cm<sup>2</sup>) (n= 4 biological replicates) or ciprofloxacin (0.5 $\mu$ g/ml) (n = 4 biological replicates). All values are normalized to WT untreated at 1. Significance is calculated as \*= p < 0.05 using 2-way ANOVA compared to WT untreated. Error bars are SEM

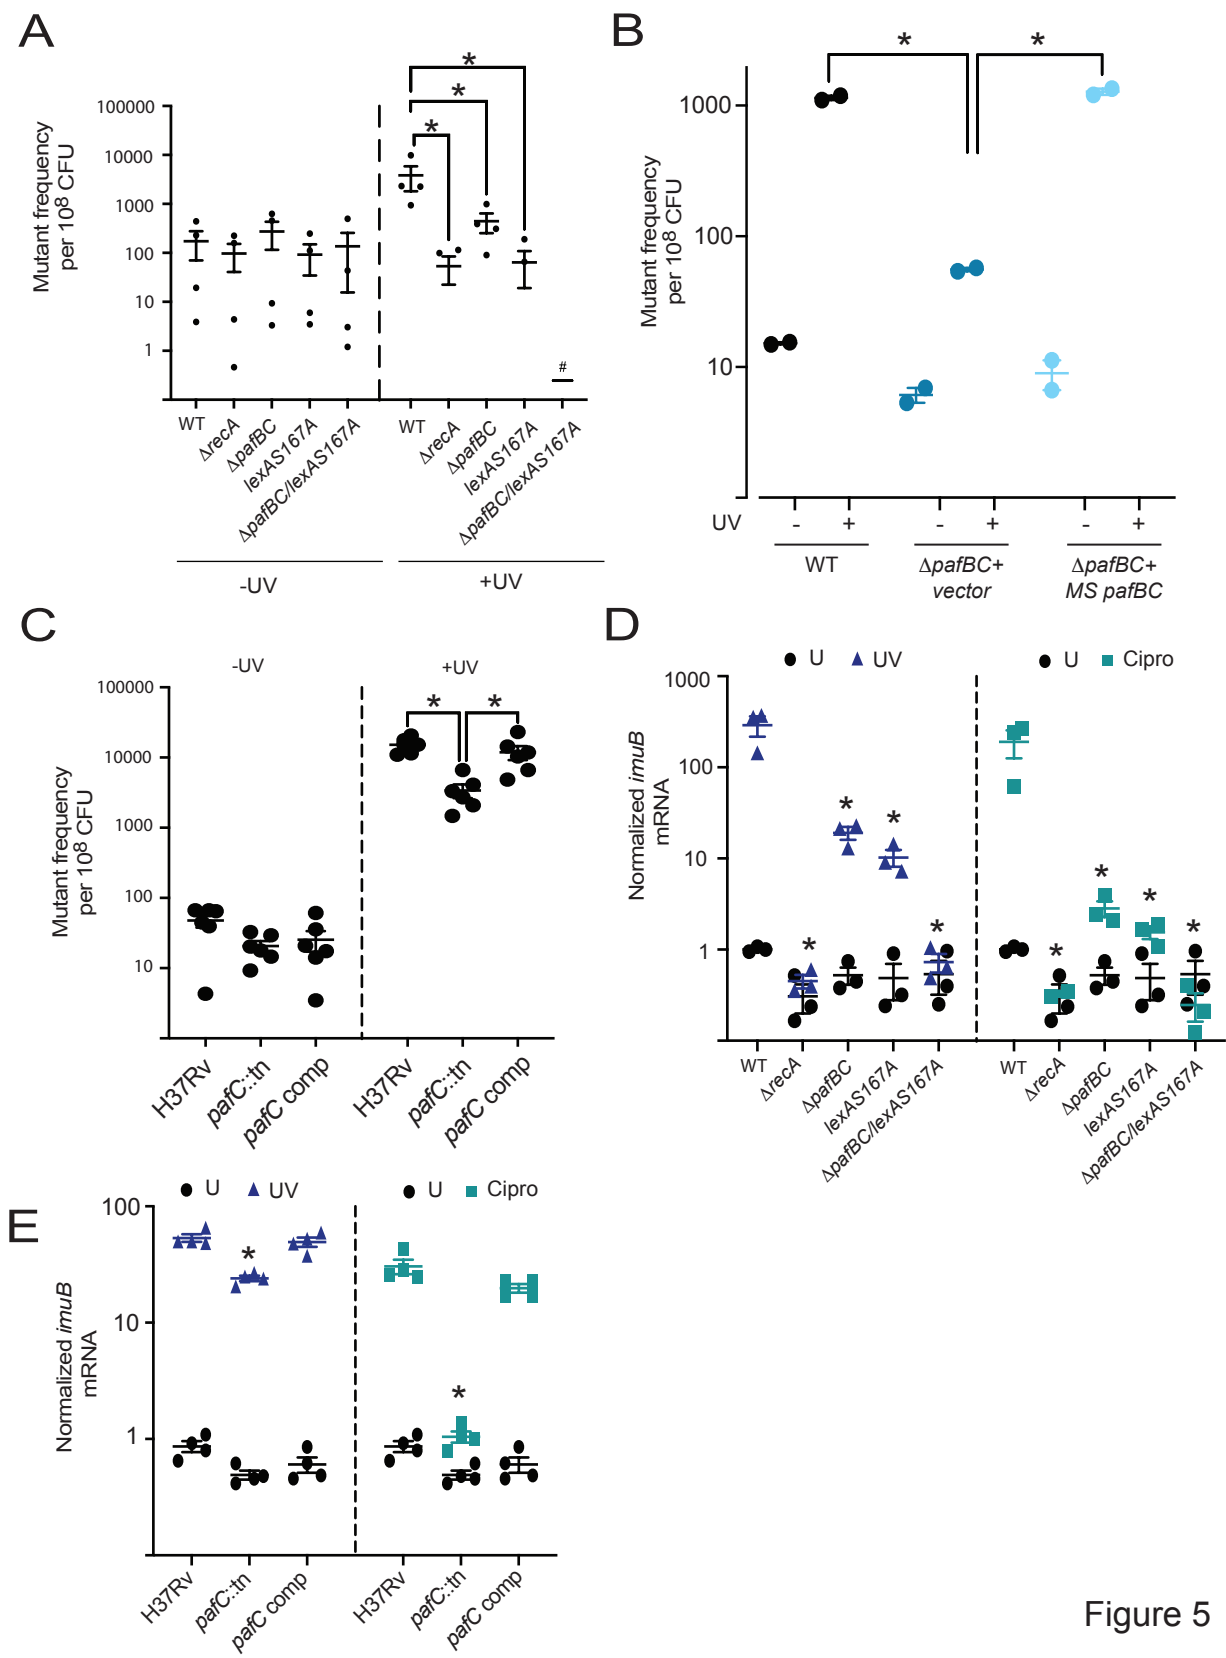

628

629 **Figure 6- Ciprofloxacin is a selective inducer of the PafBC pathway**  $\alpha$ -RecA western blot of  
630 mid-log phase expression of RecA (37kD) in *M. smegmatis* WT,  $\Delta pafBC$  and *lexAS167A* after  
631 exposure to **(A)** UV (20mJ/cm<sup>2</sup> with a recovery period of 1 hour or 3 hours after exposure), **(B)**  
632 ciprofloxacin (1.25 $\mu$ g/ml for 1 hour or 3 hours) or **(C)** MMC (80ng/ml for 2 hours or 5 hours). RpoB  
633 is shown as a loading control. Quantification of RecA levels normalized to RpoB levels from 3  
634 biological replicates for each of the DNA damaging agents is shown in the right panels of **(A)**, **(B)**  
635 and **(C)**. All RpoB normalized RecA levels are displayed as a percentage of WT untreated set at  
636 100%. Significance is calculated as \*= p < 0.05 using 2-way ANOVA compared to mc<sup>2</sup>155 at a  
637 comparable timepoint/condition. Error bars are SEM **(D)**  $\alpha$ -RecA immunoblot of mid-log phase  
638 expression of RecA (37kD) in *M. smegmatis*  $\Delta pafBC$  complemented with either *M. tuberculosis*  
639 *pafBC*, *M. smegmatis pafBC* or empty vector (EV) after exposure to UV (20mJ/cm<sup>2</sup>) or  
640 ciprofloxacin (1.25 $\mu$ g/ml) after 3 hours **(E)**  $\alpha$ -RecA western blot of mid-log phase expression of  
641 RecA (37kD) in *M. tuberculosis* strains of WT H37Rv, transposon insertion mutant of *pafC* (*pafC*  
642 TN) and transposon insertion mutant of *pafC* complemented with *pafC* (*pafC* comp) after  
643 exposure to UV (20mJ/cm<sup>2</sup> with a recovery period of 24 hours after exposure) or ciprofloxacin  
644 (1.25 $\mu$ g/ml for 24 hours). RpoB is shown as a loading control  
645

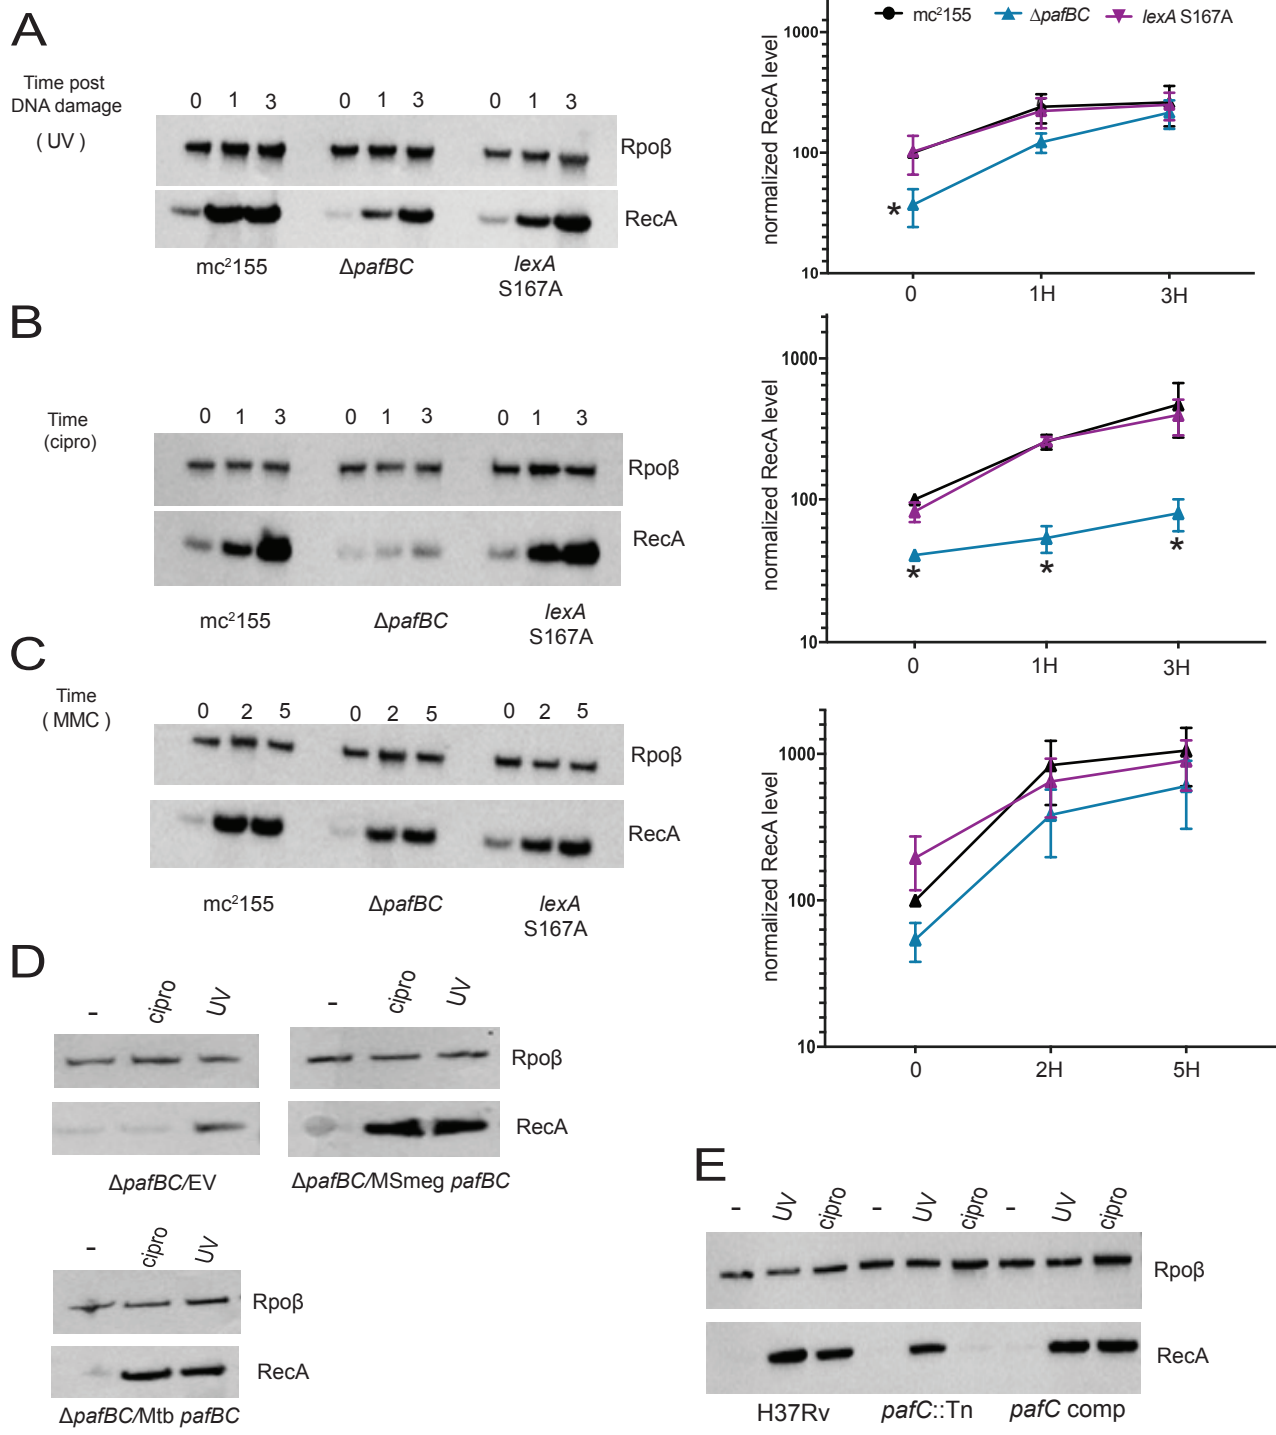

Figure 6

646

647 **Figure 7- Inhibition of DNA replisome function selectively induces the PafBC pathway  $\alpha$ -**

648 RecA immunoblot of mid-log phase expression of RecA (37kb) in *mc<sup>2</sup>155*,  $\Delta$ *pafBC* and *lexAS167A*

649 strains after exposure to **(A)** cumene hydroperoxide (CHP, 50 $\mu$ M for 1 hour or 3 hours) **(B)**

650 SKI356313 (1.9 $\mu$ M for 1 hour or 3 hours) **(C)** Etoposide (24 $\mu$ M for 3 hours) **(D)** ATc induced

651 overexpression of DinB1 for 4 hours or 6 hours **(E)** ATc induced overexpression of DinB1 missing

652 the beta-clamp interaction domain (DinB1- $\Delta$ 356-360) for 4 hours or 6 hours or **(F)** ATc induced

653 overexpression of polymerase-dead DinB1 (*dinB1-D113A*) for 4 hours or 6 hours.

654

655

656



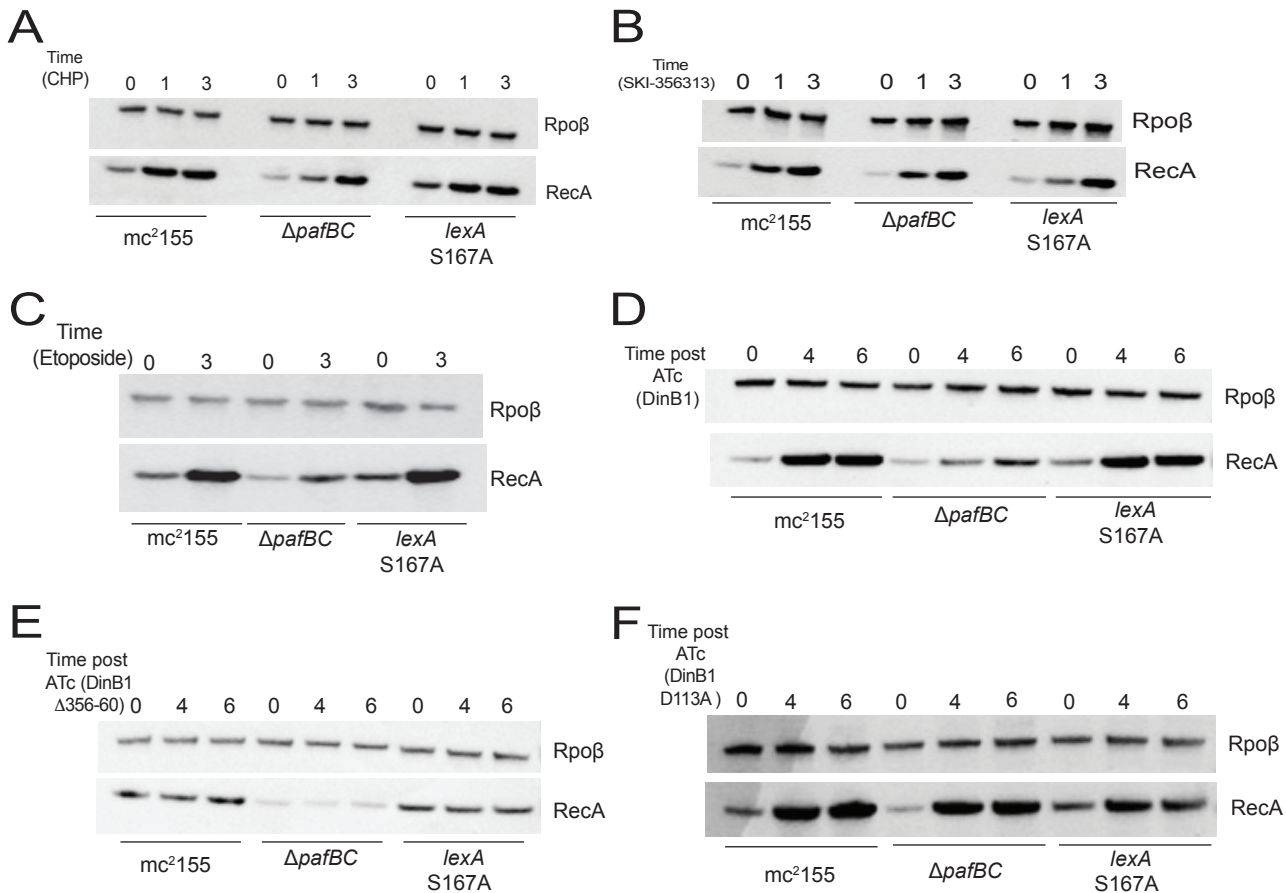

Figure 7

**Figure S1 – Transcriptional profiles after ciprofloxacin and UV induced DNA damage**

**(A)** Venn diagram categorizing genes that are upregulated ( $\log_2$  fold change  $\geq 1.5$ ) in mc<sup>2</sup>155 by ciprofloxacin (0.5  $\mu$ g/ml) or UV (20mJ/cm<sup>2</sup>) (n = 2)

**(B)** Venn diagram categorizing genes that are upregulated ( $\log_2$  fold change  $\geq 1.5$ ) in H37Rv by ciprofloxacin (0.5  $\mu$ g/ml) or UV (20mJ/cm<sup>2</sup>) (n = 1)

**(C) The *pafC* quinolone responsive regulon.** Gene expression heatmap of genes that are induced by ciprofloxacin and are *pafC* dependent in this condition, but not after UV, from transcriptomic profiling by RNA sequencing of H37Rv, transposon insertion mutant of *pafC* (*pafC*::TN) and transposon insertion mutant of *pafC* complemented with *pafC* (comp)

A

mc<sup>2</sup>155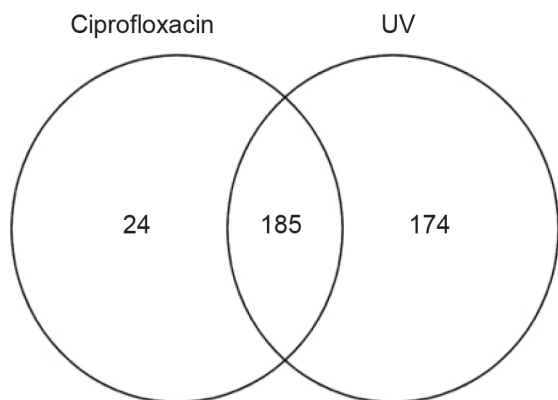

B

H37Rv

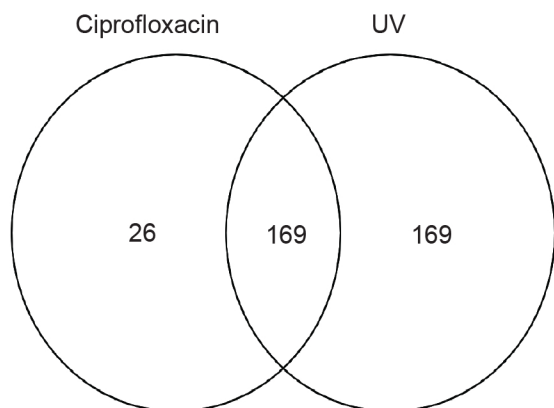

C

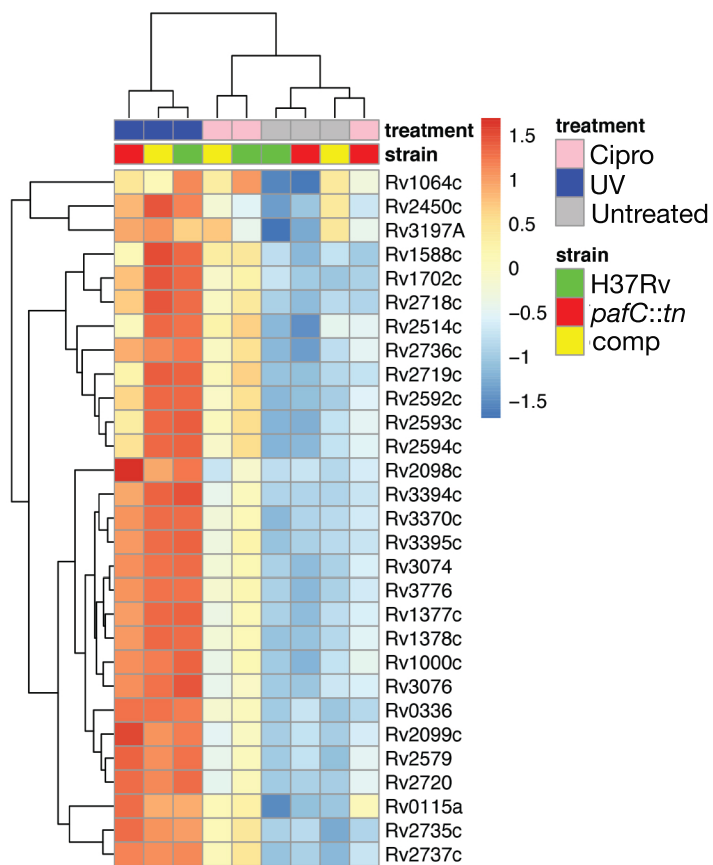

**Figure S2 - The functional impairment of the DDR that accompanies PafBC and SOS inactivation is independent of RecA** (A)  $\alpha$ -RecA western blot of mid-log phase expression of RecA (37kb) in *mc*<sup>2155</sup> and  $\Delta$ *recA* strains either with an empty vector (V) or with *recA* under an ATc inducible promoter (*irecA*) after exposure to UV (20mJ/cm<sup>2</sup> for 1 hour or 3 hours) and in the presence of ATc (B)  $\alpha$ -RecA western blot of mid-log phase expression of RecA (37kb) in  $\Delta$ *pafBC*, *lexA-S167A* and  $\Delta$ *pafBC/lexA-S167A* either with an empty vector (EV) or with *recA* under an ATc inducible promoter (*irecA*) after exposure to UV (20mJ/cm<sup>2</sup> for 1 hour or 3 hours) and in the presence of ATc. RpoB is used as a loading control (C) Percentage survival of *mc*<sup>2155</sup>,  $\Delta$ *recA*,  $\Delta$ *pafBC*, *lexA-S167A* and  $\Delta$ *pafBC/lexA-S167A* strains with either empty vector (V: dotted lines, left panel) or with *recA* induced from an ATc inducible promoter (*irecA*: solid line, right panel) after exposure to UV (0, 5, 10 or 20mJ/cm<sup>2</sup>) in the presence of ATc (n = 3 biological replicates). (D,E) Normalized mRNA levels in *M. smegmatis* *mc*<sup>2155</sup>,  $\Delta$ *recA*,  $\Delta$ *pafBC*, *lexA-S167A* and  $\Delta$ *pafBC/lexA-S167A* strains with either empty vector (EV: dotted line) or with *recA* under an ATc inducible promoter (*irecA*: solid line) after exposure to UV (20mJ/cm<sup>2</sup>) measured by RT-qPCR for (D) *adnA* (n= 3 biological replicates) or (E) *dnaE2* (n= 3 biological replicates). Significance is calculated as \* = p < 0.05 using 2-way ANOVA compared to *mc*<sup>2155</sup> at a comparable timepoint/condition. All error bars are SEM

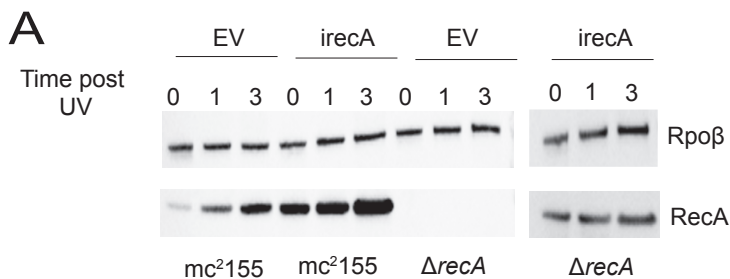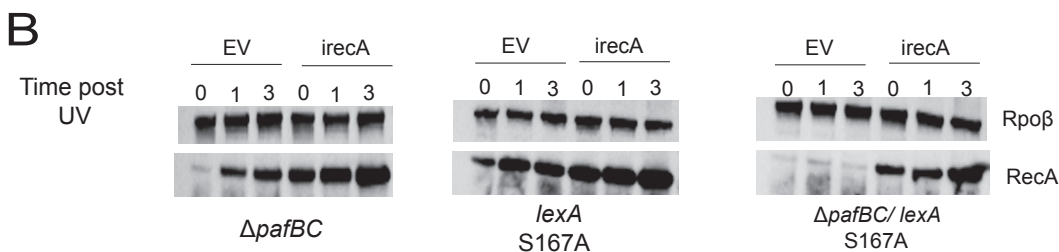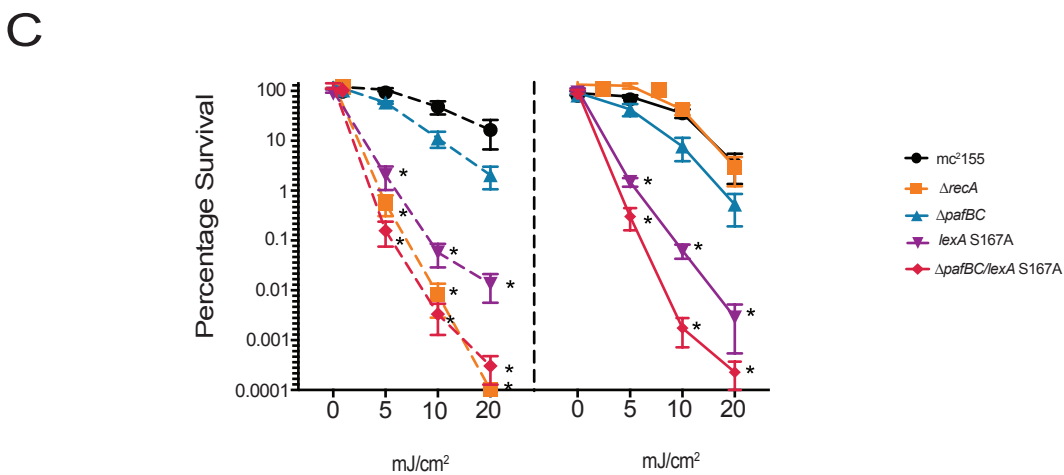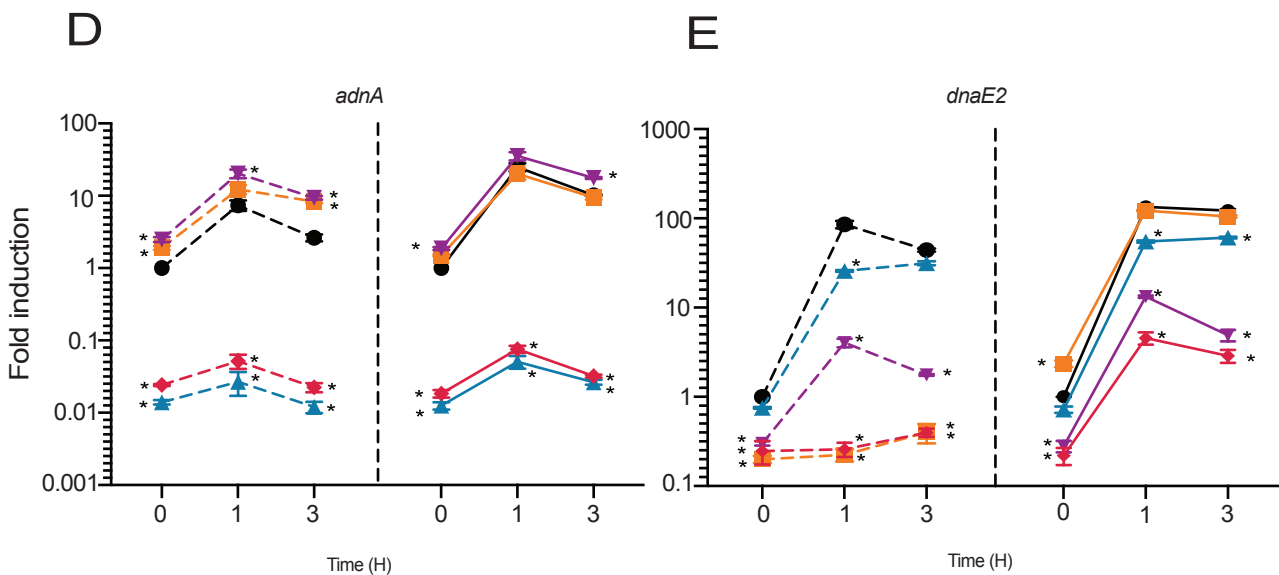

Source: https://biorxiv.org/content/10.1101/2021.08.05.455301v1.full.pdf
